# Supplementary material for: Psychometric properties of the Chinese version of the WHOQOL-HIV BREF to assess quality of life among people living with HIV/AIDS: a cross-sectional study
Source: PubMed Central journal article supplement — BMJ Open. 2017 Aug 21;7(8):e016382. doi: 10.1136/bmjopen-2017-016382 (PMC5629727; doi:10.1136/bmjopen-2017-016382), 2017-08-21
Supplement: bmjopen-2017-016382.draft_revisions.pdf [file bmjopen-2017-016382.draft_revisions.pdf]

# BMJ Open

BMJ Open is committed to open peer review. As part of this commitment we make the peer review history of every article we publish publicly available.

When an article is published we post the peer reviewers' comments and the authors' responses online. We also post the versions of the paper that were used during peer review. These are the versions that the peer review comments apply to.

The versions of the paper that follow are the versions that were submitted during the peer review process. They are not the versions of record or the final published versions. They should not be cited or distributed as the published version of this manuscript.

BMJ Open is an open access journal and the full, final, typeset and author-corrected version of record of the manuscript is available on our site with no access controls, subscription charges or pay-per-view fees (<http://bmjopen.bmj.com>).

If you have any questions on BMJ Open's open peer review process please email [editorial.bmjopen@bmj.com](mailto:editorial.bmjopen@bmj.com)

# BMJ Open

## Psychometric properties of the Chinese version of WHOQOL-HIV BREF to assess quality of life among People Living with HIV/AIDS

|                                 |                                                                                                                 |
|---------------------------------|-----------------------------------------------------------------------------------------------------------------|
| Journal:                        | <i>BMJ Open</i>                                                                                                 |
| Manuscript ID                   | bmjopen-2017-016382                                                                                             |
| Article Type:                   | Research                                                                                                        |
| Date Submitted by the Author:   | 11-Feb-2017                                                                                                     |
| Complete List of Authors:       | Zhu, Yaxin; China Medical University<br>Liu, Jie; China Medical University<br>Qu, Bo; China Medical University, |
| <b>Primary Subject Heading</b>: | Infectious diseases                                                                                             |
| Secondary Subject Heading:      | HIV/AIDS                                                                                                        |
| Keywords:                       | WHOQOL-HIV BREF, quality of life, psychometric properties, AIDS                                                 |
|                                 |                                                                                                                 |

SCHOLARONE™  
Manuscripts

1  
2  
3  
4 **Psychometric properties of the Chinese version of WHOQOL-HIV BREF to**  
5  
6 **assess quality of life among People Living with HIV/AIDS**  
7

8 Yaxin Zhu<sup>1</sup>, Jie Liu<sup>2</sup>, Bo Qu<sup>1\*</sup>  
9

10  
11 <sup>1</sup>Department of Social Medicine, School of Public Health, China Medical University,  
12  
13 Shenyang, Liaoning Province, P.R. China  
14

15  
16 <sup>2</sup>Department of Health Statistics, School of Public Health, China Medical University,  
17  
18 Shenyang, Liaoning Province, P.R. China  
19

20  
21  
22  
23  
24  
25  
26 \* **Correspondence to:** Bo Qu, M.D., Ph.D., Department of Health Statistics, School  
27  
28 of Public Health, China Medical University, 77 Puhe road, Shenyang North New Area,  
29  
30 Shenyang 110122, People's Republic of China.  
31

32  
33  
34 Tel: 86-24-31939588  
35

36 Fax: 86-24-31939588  
37

38  
39 E-mail: qubo6666@163.com  
40  
41

42  
43  
44 **Keywords:** WHOQOL-HIV BREF; quality of life; psychometric properties; AIDS  
45

46 **Word count:** 3892  
47  
48  
49  
50  
51  
52  
53  
54  
55  
56  
57  
58  
59  
60

## Abstract

**Objectives:** This study aims to assess the psychometric properties of the Chinese version of WHOQOL-HIV BREF.

**Design:** Cross-sectional study

**Setting:** Center for Disease Control and Prevention (CDC) and infectious diseases hospitals in three Chinese provinces.

**Participants:** Sample of 1100 people living with HIV/AIDS (PLWHA).

**Interventions:** We recruited 1100 PLWHA to evaluate for QOL with the WHOQOL-HIV BREF. Of these participants, 57 were randomly selected to repeat the QOL evaluation 2 weeks later.

**Main outcome measures:** The reliability of the WHOQOL-HIV BREF was assessed with internal consistency and test-retest reliability. The construct, concurrent, convergent, discriminant, and known-group validity were also analyzed. And the factorial invariance across gender was assessed.

**Results:** The overall Cronbach's  $\alpha$  coefficient was 0.93. Except for the spirituality domain, with an  $\alpha$  below 0.70 (0.66), the other five domains were confirmed to have adequate internal consistency. The test-retest reliability revealed a statistically significant intraclass correlation coefficient (ICC) of 0.72–0.82 ( $p < 0.001$ ). A confirmatory factor analysis found that the six-domain structure produced an acceptable fit to the data. The instrument showed factorial invariance across gender groups. All domains were significantly correlated with general items and SF-36 ( $p < 0.01$ ). The correlation coefficients were  $>0.40$  ( $r = 0.40$ – $0.67$ ), except for the

1  
2  
3  
4 association between the spirituality domain and two general items (QOL:  $r = 0.33$ ;  
5  
6 health status:  $r = 0.36$ ). Subjects with lower CD4 counts had lower scores for all  
7  
8 domains ( $p < 0.05$ ). The symptomatic participants had significantly lower scores than  
9  
10 asymptomatic participants for the physical, psychological, and independence domains  
11  
12 ( $p < 0.05$ ).  
13

14  
15  
16 **Conclusions:** The WHOQOL-HIV BREF revealed good psychometric characteristics  
17  
18 among Chinese PLWHA. These findings offer promising support for the use of the  
19  
20 WHOQOL-HIV BREF as a measure of QOL among Chinese PLWHA, and in  
21  
22 cross-cultural comparative studies on QOL.  
23  
24

#### 25 26 27 28 **Strengths and limitations of this study**

- 29  
30 1. This study will provide reference for better promoting quality of life (QOL)  
31  
32 evaluation in Chinese people living with HIV/AIDS (PLWHA).  
33
- 34  
35 2. In our study, the psychometric properties were analyzed comprehensively.  
36  
37
- 38  
39 3. The study sample was recruited from three provinces covering the geographic  
40  
41 diversity of northern, central, and southern China.  
42
- 43  
44 4. A longitudinal design might further measure the sensitivity of this instrument to  
45  
46 changes in the HIV-related indicators such as CD4 count and HIV stage  
47  
48  
49  
50  
51  
52  
53  
54  
55  
56  
57  
58  
59  
60

## Introduction

The number of people living with HIV/AIDS (PLWHA) in China has continued to increase from 351,709 in 2011<sup>1</sup> to 577,423 in 2015.<sup>2</sup> According to the national data, as of February 2016, China had 591,632 PLWHA.<sup>3</sup> Although the number of PLWHA is rising, the fatality rate for AIDS has decreased gradually since 2011 as the result of increasing availability of highly active antiretroviral therapy (HAART).<sup>1</sup> The national epidemic data showed that the number of PLWHA who were currently receiving HAART increased from 295,358 in 2014<sup>1</sup> to 382,139 in 2015.<sup>2</sup> The expanded use of HAART has increased the life expectancy of PLWHA.<sup>4,5</sup>

Since the advent of HAART, AIDS has transformed from an acute fatal infection into a manageable chronic disease.<sup>4,6</sup> The evaluation of quality of life (QOL) has been demonstrated to be crucial in chronic disease treatment over the past decades.<sup>7,8</sup> Moreover, because AIDS is an incurable disease, PLWHA will continue to suffer from the disease.<sup>7</sup> Thus, QOL assessment has recently become an essential element AIDS care,<sup>7,9-12</sup> and improving the QOL among PLWHA has become a priority.<sup>13</sup>

In recent years, there has been much research on AIDS-related QOL.<sup>12-17</sup> To better understand and evaluate the QOL in PLWHA, a reliable and valid measurement tool for QOL is important.<sup>7,11</sup> There have been several instruments applied in the QOL assessment of PLWHA, such as EQ-5D,<sup>15</sup> SF-36,<sup>17</sup> WHOQOL-HIV BREF,<sup>16</sup> MOS-HIV,<sup>14</sup> AIDS-HAQ,<sup>18</sup> and FAHI.<sup>19</sup> Compared with generic questionnaires, AIDS-specific questionnaires have greater relevance and sensitivity.<sup>20</sup> Reychler also suggested that disease-specific tools for assessing QOL are of particular relevance for

1  
2  
3  
4 HIV-infected patients.<sup>7</sup> Some instruments have been developed within a single culture,  
5  
6 particularly Western culture. Consequently, versions that have been translated into a  
7  
8 different language often present lower equality of semantic and concept, which was  
9  
10 demonstrated by poorer psychometric characteristics.<sup>13,21,22</sup> Furthermore, previous  
11  
12 studies suggested that a cross-culturally valid QOL measure may be important for  
13  
14 assessing health delivery in various cultural conditions.<sup>6,20</sup>  
15  
16  
17  
18

19 In 2003, WHO developed the WHOQOL-HIV, with 120 items (100 generic items  
20  
21 and 20 HIV-related items).<sup>20,23</sup> The WHOQOL-HIV is a multi-dimensional instrument  
22  
23 developed by multi-national collaboration. Furthermore, the instrument has been  
24  
25 proven through field test to be promising for QOL assessment in different cultural  
26  
27 contexts.<sup>24</sup> The Chinese version of WHOQOL-HIV was developed by the research  
28  
29 team from Sun Yat-sen University and China Academy of Chinese Medical  
30  
31 Sciences.<sup>25,26</sup>  
32  
33  
34  
35

36 WHOQOL-HIV BREF is the short version of the WHOQOL-HIV, including 31  
37  
38 items covering six domains.<sup>9</sup> And it was translated into different languages and has  
39  
40 been proven reliable and valid.<sup>9,16,27</sup> Although a few studies have applied this  
41  
42 instrument among Chinese PLWHA,<sup>28,29</sup> its psychometric properties have not been  
43  
44 fully assessed. This study was designed to assess the psychometric properties of  
45  
46 WHOQOL-HIV BREF among Chinese PLWHA. These findings may be of great  
47  
48 importance for better understanding their QOL.  
49  
50  
51  
52

## 53 **Materials and Methods**

### 54 **Ethics statement**

55  
56  
57  
58  
59  
60

1  
2  
3  
4 Ethical protocol was obtained from the Bioethics Advisory Commission of China  
5  
6 Medical University. The investigators informed all participants about the purpose of  
7  
8 the study and assured them before research began that their privacy would be  
9  
10 protected. All of the subjects provided written informed consent and voluntarily  
11  
12 completed self-administered questionnaires.  
13  
14

## 15 16 **Study population and procedures** 17

18  
19 A convenience sample was recruited from five cities (Shenyang, Dalian, Dandong,  
20  
21 Zhengzhou, Ningbo) covering the geographic diversity of northern, central, and  
22  
23 southern China. Shenyang, Dalian, and Dandong are three cities in Liaoning province,  
24  
25 which is situated in the northeast region of China. Zhengzhou is the capital of Henan  
26  
27 province, in the central region of China. Ningbo is a city in Zhejiang province, which  
28  
29 is in the southern region of China. Inclusion criteria were that participants were 18  
30  
31 years or older, infected with HIV, and without cognitive impairment. A total of 1201  
32  
33 PLWHA were recruited from local Center for Disease Control and Prevention (CDC)  
34  
35 and infectious diseases hospitals between February 2015 and January 2016. To ensure  
36  
37 the quality of the questionnaire, after completing the questionnaires, specially trained  
38  
39 investigators inspected the questionnaires, identified the questionnaires that were  
40  
41 filled out with non-standard and ambiguous answers. All of the subjects received a  
42  
43 self-reported questionnaire and were compensated with 50 Chinese Yuan after  
44  
45 completing the questionnaire. If >20% of one questionnaire were missing, the  
46  
47 questionnaire was regarded as invalid. Questionnaires with valid responses were  
48  
49 collected from a total of 1100 participants, and the valid response rate was 91.6%.  
50  
51  
52  
53  
54  
55  
56  
57  
58  
59  
60



1  
2  
3  
4 MM Shoukri et al. suggested that sample size for the design of test-retest reliability  
5  
6 study required to estimate ICC of 0.8 with a 95% CI having width of 0.2 (i.e. the  
7  
8 value of ICC is between 0.7 and 0.9 ) should be 52.<sup>30</sup> To examine the test-retest  
9  
10 reliability, 57 participants were randomly selected to complete the QOL evaluation  
11  
12 again 2 weeks later.  
13  
14

## 15 16 **Questionnaire** 17

18  
19 The survey questionnaire comprised four sections including socio-demographic  
20  
21 information, HIV-related characteristics, WHOQOL-HIV BREF, and SF-36. The  
22  
23 socio-demographic information included age, gender, work status, and so on.  
24  
25 HIV-related characteristics consisted of HIV stage, CD4 cell counts, mode of HIV  
26  
27 transmission, and time since diagnosis. As categorized by the clinically meaningful  
28  
29 cut-off points,<sup>31</sup> CD4 cell count was stratified into three groups. HIV stage was  
30  
31 divided into two groups: HIV-asymptomatic and HIV-symptomatic.<sup>13,21,32</sup>  
32  
33  
34  
35

36  
37 WHOQOL-HIV BREF consists of 31 items rated on a five-point Likert scale.  
38  
39 Among the 31 items, 29 domain-specific items are used to measure individual QOL  
40  
41 across six domains. The other two items are used to measure perspective of general  
42  
43 QOL and health status. The domain scores were calculated by multiplying the mean of  
44  
45 all items within the domain by 4. All domain scores range from 4 to 20. Higher scores  
46  
47 in each domain indicate higher QOL for that domain. Hao and He translated  
48  
49 WHOQOL-HIV BREF into Chinese according to the method proposed by WHO.<sup>25,26</sup>  
50  
51  
52  
53

54  
55 SF-36 is a widely-used QOL evaluation tool in the world.<sup>33</sup> And this generic  
56  
57 measurement tool has proven to be reliable and validity for assessing of QOL of  
58  
59  
60

1  
2  
3  
4  
5  
6  
7  
8  
9  
10  
11  
12  
13  
14  
15  
16  
17  
18  
19  
20  
21  
22  
23  
24  
25  
26  
27  
28  
29  
30  
31  
32  
33  
34  
35  
36  
37  
38  
39  
40  
41  
42  
43  
44  
45  
46  
47  
48  
49  
50  
51  
52  
53  
54  
55  
56  
57  
58  
59  
60

PLWHA.<sup>34,35</sup> SF-36 includes 36 items covering 8 domains, and the domain scores form two summary scores.<sup>7</sup> They are the physical component summary (PCS) and the mental component summary (MCS) scores, which range from 0 to 100.<sup>36,37</sup> Higher scores indicating a better QOL. The reliability of this instrument in our study was satisfactory, with the alpha equaling to 0.93.

## Statistical analysis

The missing data were replaced by median. The mean, standard deviation (SD), skeweness, kurtosis, floor effects, and ceiling effects of each item and domain were computed. Floor or ceiling effects were significant if the percentage of subjects having the lowest or the highest score was >20%.<sup>27,38</sup> Cronbach's  $\alpha$  coefficient of  $\geq 0.70$  was considered acceptable internal consistency reliability. Intraclass correlation coefficient (ICC) was applied for test-retest reliability, with  $ICC \geq 0.70$  indicating good test-retest reliability.<sup>39</sup>

To test the construct validity, confirmatory factor analysis (CFA) was used.<sup>40</sup> Goodness-of-fit was evaluated using the indexes including  $\chi^2$ , root mean square error of approximation (RMSEA), comparative fit index (CFI), and adjusted goodness-of-fit index (AGFI). A RMSEA value <0.08 and a CFI value >0.90 indicated a good fit.<sup>40</sup> For AGFI, a value of >0.85 was considered adequate model fit.<sup>40</sup> A multiple-group CFA analysis was conducted to investigate whether the WHOQOL-HIV BREF is measuring same constructs across gender groups. First, we assessed for configural invariance. The next step involved assessing for metric invariance by examining if the factor loadings were the same across gender groups.

1  
2  
3  
4 Changes in CFI ( $\Delta\text{CFI} \leq 0.01$ ) was used to demonstrate factorial invariance across  
5  
6 groups.<sup>13,41</sup>  
7

8  
9 Regarding concurrent validity, all domains were correlated with two general items  
10  
11 (QOL and health status) and SF-36.<sup>7,25</sup> The scale's convergent and discriminant  
12  
13 validity were tested by calculating item-domain Pearson's correlations. A correlation  
14  
15 coefficient of  $>0.4$  for items with their respective domain was considered to be  
16  
17 satisfactory.<sup>7,27</sup> Items revealing higher correlations with the respective domain score  
18  
19 than with other domains indicated good discriminant validity.<sup>42</sup>  
20  
21

22  
23 Known-group validity was used to test how well the WHOQOL-HIV BREF  
24  
25 discriminated among the subgroups of participants with regard to CD4 count and HIV  
26  
27 stage. Multivariate analysis of variance (MNOVA) was conducted to analysis the  
28  
29 known-group validity. Post hoc tests were conducted to examine significant  
30  
31 differences in domain scores among the three CD4 groups. It was hypothesized that  
32  
33 HIV-symptomatic participants and PLWHA with lower CD4 counts would have  
34  
35 significantly lower QOL domain scores. Values of  $p < 0.05$  were considered to be  
36  
37 statistically significant. SPSS 19.0 and LISREL 8.5 software for Windows was used.  
38  
39  
40  
41  
42

## 43 44 **Results**

### 45 46 **Basic characteristics of the study sample**

47  
48 The mean age of the 1100 participants was 39.62 years, with a SD of 12.73. Most  
49  
50 of the participants were male (965, 87.7%). Of the 1100 participants, 713 (64.8%)  
51  
52 were infected with HIV through male homosexual sex. 691 (62.8%) were  
53  
54 asymptomatic. The time since diagnosis was 3.91 years (SD = 2.85). The  
55  
56  
57  
58  
59  
60

socio-demographic and HIV-related characteristics are shown in Table 1.

**Table 1. Socio-demographic and HIV-related characteristics of the sample (N = 1100).**

| Characteristic                     | Number | Percentage |
|------------------------------------|--------|------------|
| Gender                             |        |            |
| Male                               | 965    | 87.7%      |
| Female                             | 135    | 12.3%      |
| Work status                        |        |            |
| Employed full-time                 | 643    | 58.4%      |
| Employed part-time                 | 420    | 38.2%      |
| Unemployed                         | 37     | 3.4%       |
| Marital status                     |        |            |
| Single                             | 450    | 40.9%      |
| Married                            | 443    | 40.3%      |
| Divorced/Widowed                   | 207    | 18.8%      |
| Education level                    |        |            |
| Primary school or lower            | 138    | 12.5%      |
| Junior high school                 | 331    | 30.1%      |
| Senior high school                 | 235    | 21.4%      |
| Junior college                     | 184    | 16.7%      |
| College or above                   | 212    | 19.3%      |
| Residence                          |        |            |
| Shenyang                           | 193    | 17.6%      |
| Dalian                             | 205    | 18.6%      |
| Dandong                            | 123    | 11.2%      |
| Zhengzhou                          | 381    | 34.6%      |
| Ningbo                             | 198    | 18.0%      |
| Monthly income (Yuan)              |        |            |
| <1000                              | 222    | 20.2%      |
| 1001–2000                          | 256    | 23.3%      |
| 2001–3000                          | 314    | 28.5%      |
| ≥3001                              | 308    | 28.0%      |
| HIV stage                          |        |            |
| Symptomatic                        | 409    | 37.2%      |
| Asymptomatic                       | 691    | 62.8%      |
| CD4 count (cells/mm <sup>3</sup> ) |        |            |
| <200                               | 99     | 9.0%       |
| 200–499                            | 642    | 58.4%      |
| ≥500                               | 359    | 32.6%      |
| Mode of HIV transmission           |        |            |

|                     |     |       |
|---------------------|-----|-------|
| Male homosexual sex | 713 | 64.8% |
| Heterosexual sex    | 210 | 19.1% |
| Drug abuse          | 11  | 1.0%  |
| Blood product       | 112 | 10.2% |
| Unknown             | 54  | 4.9%  |

## Score distributions

The descriptive statistics of each item and domain are displayed in Table 2. The skewness and kurtosis coefficients of all items and domains ranged from  $-1.00$  to  $1.00$ , which were acceptable. No significant floor or ceiling effects were found in the six domains. However, the item measuring pain and discomfort showed a significant ceiling effect (35.9%), and floor effects were detected in the items measuring social inclusion (22.4%) and financial resources (24.2%). Across domains, the physical domain had the highest score ( $13.76 \pm 2.94$ ), and the environment domain score was the lowest ( $12.05 \pm 2.88$ ).

**Table 2. Descriptive statistics of the WHOQOL-HIV BREF (N = 1100).**

| Domain or item                     | Mean $\pm$ SD    | Skewness | Kurtosis | Floor (%) | Ceiling (%) |
|------------------------------------|------------------|----------|----------|-----------|-------------|
| General QOL                        | 3.27 $\pm$ 0.92  | -0.18    | 0.5      | 5.0       | 9.8         |
| General health status              | 3.10 $\pm$ 0.94  | -0.09    | -0.09    | 5.2       | 6.6         |
| Physical                           | 13.76 $\pm$ 2.94 | -0.19    | -0.25    | 0.1       | 1.5         |
| Pain and discomfort                | 4.01 $\pm$ 0.99  | -0.98    | 0.46     | 1.8       | 35.9        |
| Symptoms of PLWHA                  | 3.48 $\pm$ 1.08  | -0.49    | -0.64    | 3.9       | 15.3        |
| Energy and fatigue                 | 3.19 $\pm$ 1.19  | -0.02    | -0.91    | 7.9       | 17.6        |
| Sleep and rest                     | 3.08 $\pm$ 1.04  | -0.19    | -0.33    | 8.7       | 8.3         |
| Psychological                      | 12.16 $\pm$ 2.81 | 0.26     | -0.16    | 0.1       | 0.8         |
| Positive feelings                  | 2.83 $\pm$ 1.09  | 0.04     | -0.71    | 12.5      | 5.9         |
| Cognition                          | 2.90 $\pm$ 1.00  | 0.01     | -0.47    | 8.3       | 5.0         |
| Body image and appearance          | 3.07 $\pm$ 1.11  | 0.10     | -0.50    | 8.1       | 13.3        |
| Self-esteem                        | 3.17 $\pm$ 0.98  | -0.25    | -0.18    | 5.8       | 7.4         |
| Negative feelings                  | 3.24 $\pm$ 0.99  | 0.03     | -0.25    | 4.0       | 12.5        |
| Independence                       | 13.19 $\pm$ 2.82 | -0.13    | 0.17     | 0.2       | 1.6         |
| Dependence on medication/treatment | 3.02 $\pm$ 1.12  | 0.07     | -0.78    | 8.3       | 10.7        |
| Mobility                           | 3.57 $\pm$ 0.96  | -0.42    | 0.13     | 3.5       | 17.2        |
| Activities of living               | 3.32 $\pm$ 0.91  | -0.29    | 0.20     | 3.9       | 8.9         |
| Working capacity                   | 3.28 $\pm$ 0.96  | -0.36    | 0.03     | 5.4       | 8.6         |
| Social relationships               | 12.15 $\pm$ 2.91 | -0.02    | 0.16     | 0.9       | 0.9         |
| Social inclusion                   | 2.60 $\pm$ 1.20  | 0.28     | -0.81    | 22.4      | 7.2         |
| Personal relationships             | 3.27 $\pm$ 0.90  | -0.36    | 0.27     | 4.4       | 6.8         |
| Sex life                           | 2.96 $\pm$ 0.94  | -0.23    | 0.04     | 8.5       | 4.2         |
| Social support                     | 3.31 $\pm$ 0.91  | -0.35    | 0.28     | 4.4       | 8.3         |
| Environment                        | 12.05 $\pm$ 2.88 | 0.01     | -0.05    | 0.5       | 0.5         |

1  
2  
3  
4  
5  
6  
7  
8  
9  
10  
11  
12  
13  
14  
15  
16  
17  
18  
19  
20  
21  
22  
23  
24  
25  
26  
27  
28  
29  
30  
31  
32  
33  
34  
35  
36  
37  
38  
39  
40  
41  
42  
43  
44  
45  
46  
47  
48  
49

|                                          |              |       |       |      |       |
|------------------------------------------|--------------|-------|-------|------|-------|
| Physical safety and security             | 2.85 ± 1.03  | -0.01 | -0.53 | 10.5 | 4.9   |
| Home environment                         | 2.97 ± 1.00  | -0.09 | -0.24 | 8.5  | 6.0   |
| Financial resources                      | 2.54 ± 1.19  | 0.33  | -0.70 | 24.2 | 7.1   |
| Opportunities for information and skills | 2.95 ± 1.13  | 0.03  | -0.72 | 11.0 | 9.2   |
| Opportunities for recreation and leisure | 2.89 ± 1.21  | 0.11  | -0.89 | 14.2 | 11.0  |
| Physical environment                     | 3.25 ± 0.94  | -0.37 | 0.08  | 5.3  | 7.4   |
| Access to health and social care         | 3.38 ± 1.00  | -0.48 | 0.06  | 6.0  | 11.5  |
| Transport                                | 3.26 ± 0.94  | -0.31 | 0.08  | 4.9  | 8.2   |
| Spirituality                             | 13.07 ± 3.44 | -0.32 | -0.41 | 0.8  | 1.0   |
| Spiritual                                | 2.89 ± 1.14  | -0.01 | -0.78 | 13.4 | 7.9   |
| Forgiveness                              | 3.32 ± 1.23  | -0.22 | -0.84 | 7.5  | 20.2  |
| Fear of the future                       | 3.39 ± 1.22  | -0.43 | -0.83 | 8.4  | 19.2  |
| Death and dying                          | 3.46 ± 1.30  | -0.51 | -0.87 | 11.0 | 100.0 |

## Reliability

The internal consistency was excellent, for the overall Cronbach's  $\alpha$  coefficient of 0.93. The spirituality domain had an  $\alpha$  of 0.66, which was slightly below the cut-off value of 0.70 for acceptable internal consistency. The other five domains were confirmed to have adequate internal consistency. The test-retest reliability showed a statistically significant ICC for all domains. The test-retest values were good, with the ICC ranging from 0.72 (spirituality domain) to 0.82 (independence domain) ( $p < 0.001$ ). The results are reported in Table 3.

**Table 3. Internal consistency and test-retest reliability of the WHOQOL-HIV BREF.**

| Domain               | Cronbach's $\alpha$ coefficient<br>(n = 1100) | ICC (95% CI)<br>(n = 57) |
|----------------------|-----------------------------------------------|--------------------------|
| Physical             | 0.71                                          | 0.76 (0.63–0.85)***      |
| Psychological        | 0.70                                          | 0.73 (0.57–0.83)***      |
| Independence         | 0.85                                          | 0.82 (0.71–0.89)***      |
| Social relationships | 0.71                                          | 0.80 (0.69–0.88)***      |
| Environment          | 0.83                                          | 0.74 (0.59–0.84)***      |
| Spirituality         | 0.66                                          | 0.72 (0.56–0.82)***      |

\*\*\*  $p < 0.001$

## Construct validity

The CFA results showed that the six-domain structure of the WHOQOL-HIV BREF produced an acceptable fit to the data ( $\chi^2 = 5662.69$ ,  $df = 362$ ,  $p < 0.001$ ; CFI = 0.81; RMSEA = 0.07 [90 % CI: 0.04–0.08]; AGFI = 0.87). Except for the item measuring spiritual, the factor loads of each item with their respective domain was acceptable, ranging from 0.35 to 0.89, which are shown in Figure 1.

**Fig 1. The structure of the Chinese version of WHOQOL-HIV BREF from confirmatory factor analysis.**



The six-factor structure of the WHOQOL-HIV BREF was tested across gender groups to evaluate factorial invariance. The results of configural invariance showed the invariance of the factor structure across gender groups:  $\chi^2 = 6982.87$ ,  $p < 0.001$ , CFI = 0.808, and RMSEA = 0.072. The findings for metric invariance showed that the factor loadings were the same across gender groups:  $\chi^2 = 6960.17$ ,  $p < 0.001$ , CFI = 0.809, and RMSEA = 0.073. And the change of CFI was 0.001, which was lower than 0.01. The Chinese version of WHOQOL-HIV BREF showed factorial invariance for PLWHA across gender groups.

### Concurrent validity

The correlation coefficients of all domains with the two general measures (general QOL and general health status) and two component summary scores of SF-36 (PCS and MCS) are displayed in Table 4. All domains correlated with both general QOL and health status significantly ( $p < 0.01$ ). The correlation coefficients were  $>0.40$  ( $r = 0.44$ – $0.57$ ), with the exception of the association between the spirituality domain and the two items (QOL:  $r = 0.33$ ; health status:  $r = 0.36$ ). And the coefficients between all domains and two component summary scores were  $>0.40$  ( $r = 0.40$ – $0.67$ ,  $p < 0.01$ ). Generally, these results indicated satisfactory concurrent validity of the WHOQOL-HIV BREF.

**Table 4. Concurrent validity of the WHOQOL-HIV BREF (N = 1100).**

| Domain               | Correlation coefficient |                       |        |        |
|----------------------|-------------------------|-----------------------|--------|--------|
|                      | General QOL             | General health status | PCS    | MCS    |
| Physical             | 0.56**                  | 0.54**                | 0.67** | 0.66** |
| Psychological        | 0.54**                  | 0.50**                | 0.55** | 0.62** |
| Independence         | 0.57**                  | 0.53**                | 0.63** | 0.61** |
| Social relationships | 0.47**                  | 0.44**                | 0.46** | 0.49** |
| Environment          | 0.53**                  | 0.46**                | 0.49** | 0.52** |

|              |        |        |        |        |
|--------------|--------|--------|--------|--------|
| Spirituality | 0.33** | 0.36** | 0.40** | 0.49** |
|--------------|--------|--------|--------|--------|

\*\*  $p < 0.01$ ; PCS, physical component summary; MCS, mental component summary.

## Convergent and discriminant validity

Concerning item-domain correlations, each item correlated with its respective domain score, and  $r$  coefficients ranged from 0.47 to 0.84 ( $p < 0.01$ ). With regard to discriminant validity, the majority of items revealed a higher correlation with the respective domain than with other domains ( $p < 0.01$ ). However, the item “spiritual” showed a higher correlation with the psychological domain ( $r = 0.65$ ,  $p < 0.01$ ) than with its respective (i.e., spirituality) domain ( $r = 0.50$ ,  $p < 0.01$ ). Generally, convergent and discriminant validity were considered as good (Table 5).

**Table 5. Convergent and discriminant validity of the WHOQOL-HIV BREF (N = 1100).**

| Domain               | Correlation coefficient range |                       | Convergent validity |                | Discriminant validity |                |
|----------------------|-------------------------------|-----------------------|---------------------|----------------|-----------------------|----------------|
|                      | Convergent validity           | Discriminant validity | Success/total       | Percentage (%) | Success/total         | Percentage (%) |
| Physical             | 0.66–0.72**                   | 0.24–0.66**           | 4/4                 | 100            | 4/4                   | 100            |
| Psychological        | 0.57–0.73**                   | 0.15–0.67**           | 5/5                 | 100            | 5/5                   | 100            |
| Independence         | 0.47–0.84**                   | 0.02–0.68**           | 4/4                 | 100            | 4/4                   | 100            |
| Social relationships | 0.68–0.78**                   | 0.26–0.57**           | 4/4                 | 100            | 4/4                   | 100            |
| Environment          | 0.65–0.72**                   | 0.19–0.64**           | 8/8                 | 100            | 8/8                   | 100            |
| Spirituality         | 0.50–0.84**                   | 0.14–0.65**           | 4/4                 | 100            | 3/4                   | 75             |

\*\*  $p < 0.01$

## Known-group validity

A significant multivariate effect was found for CD4 count (Wilks'  $\lambda = 0.956$ ,  $F(12, 2184) = 4.12$ ,  $p < 0.001$ ,  $\eta_p^2 = 0.022$ ). Subsequent univariate  $F$ -tests, which are shown in Table 6, indicated that all six domains contributed to the multivariate effect. Among the three groups divided by CD4 count, the mean scores for the six domains in group C (CD4 count  $\geq 500$  cells/mm<sup>3</sup>) were the highest, and the subjects having a CD4 count of  $< 200$  cells/mm<sup>3</sup> got the lowest scores ( $p < 0.05$ ).

**Table 6. Known-group validity for subgroups of participants by CD4 count (N = 1100).**

| Domain                              | Group A<br>( $< 200$<br>cells/mm <sup>3</sup> ) | Group B<br>(200–499<br>cells/mm <sup>3</sup> ) | Group C<br>( $\geq 500$<br>cells/mm <sup>3</sup> ) | $F$                  | $\eta_p^2$ |
|-------------------------------------|-------------------------------------------------|------------------------------------------------|----------------------------------------------------|----------------------|------------|
| Physical <sup>abc</sup>             | 12.63 $\pm$ 2.56                                | 13.63 $\pm$ 2.97                               | 14.30 $\pm$ 2.87                                   | 14.34 <sup>***</sup> | 0.025      |
| Psychological <sup>abc</sup>        | 11.01 $\pm$ 2.29                                | 12.05 $\pm$ 2.75                               | 12.68 $\pm$ 2.93                                   | 15.24 <sup>***</sup> | 0.027      |
| Social relationships <sup>abc</sup> | 11.32 $\pm$ 2.32                                | 11.99 $\pm$ 2.92                               | 12.65 $\pm$ 2.96                                   | 10.43 <sup>***</sup> | 0.019      |
| Independence <sup>abc</sup>         | 12.09 $\pm$ 2.50                                | 13.03 $\pm$ 2.86                               | 13.77 $\pm$ 2.72                                   | 16.50 <sup>***</sup> | 0.029      |
| Environment <sup>bc</sup>           | 11.49 $\pm$ 2.33                                | 11.93 $\pm$ 2.81                               | 12.40 $\pm$ 3.10                                   | 5.09 <sup>**</sup>   | 0.009      |
| Spirituality <sup>c</sup>           | 12.39 $\pm$ 2.86                                | 12.98 $\pm$ 3.46                               | 13.40 $\pm$ 3.51                                   | 3.81 <sup>*</sup>    | 0.007      |

\*  $p < 0.05$ ; \*\*  $p < 0.01$ ; \*\*\*  $p < 0.001$

<sup>a</sup>Group A significantly different from Group B.

<sup>b</sup>Group B significantly different from Group C.

<sup>c</sup>Group A significantly different from Group C.

Regarding HIV stage, the multivariate effect was also significant (Wilks'  $\lambda = 0.924$ ,  $F(6, 1093) = 6.92$ ,  $p < 0.001$ ,  $\eta_p^2 = 0.076$ ), and follow-up tests indicated that the symptomatic participants had significantly lower scores than asymptomatic participants on physical (13.54  $\pm$  3.03), psychological (11.69  $\pm$  2.78), and independence (12.75  $\pm$  2.73) domains ( $p < 0.05$ , see Table 7).

**Table 7. Known-group validity for subgroups of participants by HIV stage (N = 1100).**

| Domain               | Symptomatic  | Asymptomatic | F        | $\eta p^2$ |
|----------------------|--------------|--------------|----------|------------|
| Physical             | 13.54 ± 3.03 | 14.10±3.00   | 4.11*    | 0.008      |
| Psychological        | 11.69 ± 2.78 | 12.70±2.81   | 15.43*** | 0.029      |
| Social relationships | 12.02 ± 3.03 | 12.42±2.77   | 2.39     | 0.005      |
| Independence         | 12.75 ± 2.73 | 13.56±2.78   | 10.28**  | 0.020      |
| Environment          | 12.01 ± 2.87 | 12.42±2.85   | 2.49     | 0.005      |
| Spirituality         | 13.62 ± 3.17 | 13.07±3.58   | 3.07     | 0.006      |

\*  $p < 0.05$ ; \*\*  $p < 0.01$ ; \*\*\*  $p < 0.001$

## Discussion

Our results suggested that the WHOQOL-HIV BREF is reliable and valid in Chinese PLWHA. The skewness and kurtosis coefficients of all items and domains were in the acceptable range (-1.00 to 1.00), a result similar to previous studies conducted among Taiwanese HIV-infected patients and among aging Portuguese patients with HIV.<sup>6,43</sup> In line with other studies,<sup>6,43</sup> the ceiling effect of the item measuring pain and discomfort was above the accepted threshold of 20%. It is likely that the ceiling effect is dependent on population distribution.<sup>43</sup> Although previous studies have not reported the floor effects of WHOQOL-HIV BREF,<sup>6,7,21,43</sup> we detected floor effects for two items (social inclusion and financial resources).

Except for the spirituality domain, all domains showed satisfactory reliability. The results are in agreement with other reliability studies in Malaysia, Portugal, and Ethiopia.<sup>21,43-45</sup> Saddki and Pereira suggested that the content and size of the spirituality domain could result in lower reliability.<sup>21,43</sup> Tesfaye et al. noted that the limitation of the spirituality domain within this instrument should be recognized.<sup>45</sup> Chandra also indicated that the spirituality domain in the WHOQOL-HIV BREF may be inadequate, and he suggested that the WHOQOL-HIV having more items in the spirituality domain could be used to increase sensitivity in this regard.<sup>46</sup> We also

1  
2  
3  
4 found that the WHOQOL-HIV BREF has satisfactory test-retest reliability, which is  
5  
6 in agreement with the French version.<sup>7</sup>  
7

8  
9 The results of CFA suggested that the original six-domain structure could provide a  
10  
11 generally good fit for our study data, which is consistent with other studies using  
12  
13 WHOQOL-HIV BREF.<sup>9,43,45</sup> However, the exploratory factor analysis (EFA) of the  
14  
15 WHOQOL-HIV BREF carried out with Portuguese and Malaysian HIV-positive  
16  
17 patients yielded a five-factor model, which contradicts the original six-domain  
18  
19 model.<sup>21,44</sup> Except for the EFA, Canavarro also conducted a CFA of WHOQOL-HIV  
20  
21 BREF and found that both of the five-factor model and the original six-domain model  
22  
23 fit relatively well.<sup>44</sup> Moreover, Peltzer's results from a multivariate logistic regression  
24  
25 showed that four domains (psychological, independence, environment, and spirituality)  
26  
27 were major predictors for overall QOL.<sup>47</sup> Some research studies have suggested that  
28  
29 the original model fit would be improved if some items were modified.<sup>44,45</sup> The factor  
30  
31 load of spiritual item on its respective domain (i.e. "Spirituality" domain) was 0.11,  
32  
33 which was much lower than others. As previous suggested, in our study, we  
34  
35 reassigned this item to the "Psychological" domain, and then assessed the construct  
36  
37 validity again. The result showed that the factor load of spiritual item with  
38  
39 "Psychological" domain was 0.67, and model fit was also improved, with the CFI =  
40  
41 0.87, RMSEA = 0.07 (90 % CI: 0.05–0.08), AGFI = 0.89.  
42  
43  
44  
45  
46  
47  
48  
49  
50

51 The concurrent validity was demonstrated by the significant correlations with two  
52  
53 general items and SF-36. All domains correlated significantly with self-perceived  
54  
55 general QOL ( $r = 0.33$ – $0.57$ ,  $p < 0.01$ ), health status ( $r = 0.36$ – $0.54$ ,  $p < 0.01$ ), and  
56  
57  
58  
59  
60

1  
2  
3  
4 two component summary scores of SF-36 ( $r = 0.40-0.67, p < 0.01$ ). The correlation  
5  
6 coefficient was comparable to that reported in the Malay version validation study<sup>21</sup>  
7  
8 but was somewhat lower than the result of other WHOQOL-HIV BREF validation  
9  
10 studies.<sup>7,43</sup> It was noted that the spirituality domain showed the lowest correlation  
11  
12 with the general QOL ( $r = 0.33, p < 0.01$ ) and health status ( $r = 0.36, p < 0.01$ ). This  
13  
14 is consistent with results of Saddki.<sup>21</sup> More specifically, from the findings of  
15  
16 discriminant validity, the item measuring spiritual showed a higher correlation with  
17  
18 the psychological domain ( $r = 0.65, p < 0.01$ ) than with its initially assigned domain  
19  
20 (i.e., spirituality;  $r = 0.50, p < 0.01$ ). Canavarro also found this in the European  
21  
22 Portuguese version, and he suggested that this item should be modified or reassigned  
23  
24 to the psychological domain.<sup>44</sup>  
25  
26  
27  
28  
29  
30

31  
32 In support of the known-group validity, the WHOQOL-HIV BREF discriminated  
33  
34 between the CD4 count groups ( $p < 0.05$ ), which is consistent with previous  
35  
36 studies.<sup>44,48</sup> We also observed that the subjects with higher CD4 counts revealed better  
37  
38 QOL. This was also reported by other researchers.<sup>46,47</sup> However, Pereira indicated that  
39  
40 domain scores were not significantly different across CD4 counts among aging adults  
41  
42 with HIV, and he implied that associations between biological markers and QOL may  
43  
44 conflict.<sup>43</sup> Another result was that the physical, psychological, and independence  
45  
46 domains discriminated relatively well between symptomatic and asymptomatic  
47  
48 PLWHA ( $p < 0.05$ ). A multinational pilot study also showed that the domains of  
49  
50 physical and independence discriminated better than other domains between different  
51  
52 stages of HIV disease progression.<sup>9</sup> Other studies have found that the WHOQOL-HIV  
53  
54  
55  
56  
57  
58  
59  
60

1  
2  
3  
4 BREF has a good validity in respect of disease stage, and asymptomatic PLWHA have  
5  
6 better QOL than do symptomatic subjects.<sup>15,21,45,48,49</sup>  
7

8  
9 There limitations to this study that should be acknowledged. First, potential  
10  
11 limitations are imposed by convenience sampling. All subjects were enrolled from  
12  
13 health settings. The findings may thus not be generalizable to the entire population of  
14  
15 PLWHA in China. Second, a longitudinal design might further measure the sensitivity  
16  
17 of this instrument to changes in the HIV-related indicators such as CD4 count and  
18  
19 HIV stage. Furthermore, there may be some problem in translation of the spirituality  
20  
21 domain, and the next step of our research should be to assess the psychometric  
22  
23 properties again after translating and modifying this domain.  
24  
25  
26  
27

## 28 **Conclusions**

29  
30  
31 The WHOQOL-HIV BREF revealed good psychometric characteristics among  
32  
33 Chinese PLWHA. These findings offer promising support for the use of the  
34  
35 WHOQOL-HIV BREF as a measure of QOL among Chinese PLWHA, and in  
36  
37 cross-cultural comparative studies on QOL. Further studies on the spirituality domain  
38  
39 should be carried out to ensure the effectiveness of WHOQOL-HIV BREF.  
40  
41  
42

## 43 **Acknowledgments**

44  
45  
46 The authors wish to thank Shijie Liang, Xia Min, and Li Wang for help with sample  
47  
48 collection. We thank all the PLWHA participants in this study.  
49  
50

## 51 **Competing Interests**

52  
53 The authors declare that they have no competing interests.  
54

## 55 **Funding**

56  
57 This work was supported by National Natural Science Foundation of China, grant  
58  
59  
60



1  
2  
3 number 71473269 and 71673301. The funders had no role in study design, data  
4 collection and analysis, decision to publish, or preparation of the manuscript.  
5  
6  
7

## 8 **Author contributions**

9  
10 BQ designed the research. YXZ and JL participated in the data collection and analysis.  
11  
12

13 YXZ wrote the manuscript. All authors read and approved the final manuscript.  
14  
15

## 16 **Ethics approval**

17  
18 Ethical protocol was obtained from the Bioethics Advisory Commission of China  
19  
20

21 Medical University. All of the subjects provided written informed consent and  
22  
23

24 voluntarily completed self-administered questionnaires.  
25  
26

## 27 **Data sharing statement**

28 No additional unpublished data.  
29  
30  
31  
32  
33  
34  
35  
36  
37  
38  
39  
40  
41  
42  
43  
44  
45  
46  
47  
48  
49  
50  
51  
52  
53  
54  
55  
56  
57  
58  
59  
60

## References

1. National Health and Family Planning Commission of the People's Republic of China. 2015 China AIDS Response Progress Report. May 2015. Available: [http://www.aidsdatahub.org/sites/default/files/publication/China\\_narrative\\_report\\_2015.pdf](http://www.aidsdatahub.org/sites/default/files/publication/China_narrative_report_2015.pdf). Accessed 16 January 2016.
2. NCAIDS, NCSTD, China CDC. Update on the AIDS/STD epidemic in China and main response in control and prevention in December, 2015. *Chin J AIDS STD* 2016;22(2):69. [In Chinese]
3. NCAIDS, NCSTD, China CDC. Update on the AIDS/STD epidemic in China and main response in control and prevention in February, 2016. *Chin J AIDS STD* 2016;22(4):223. [In Chinese]
4. Mutabazi-Mwesigire D, Seeley J, Martin F, Katamba A. Perceptions of quality of life among Ugandan patients living with HIV: a qualitative study. *BMC Public Health* 2014;14:343.
5. Mwesigire DM, Martin F, Seeley J, Katamba A. Relationship between CD4 count and quality of life over time among HIV patients in Uganda: a cohort study. *Health Qual Life Outcomes* 2015;13:144.
6. Hsiung PC, Fang CT, Wu CH, Sheng WH, Chen SC, Wang JD, et al. Validation of the WHOQOL-HIV BREF among HIV-infected patients in Taiwan. *AIDS Care* 2011; 23(8):1035-42.
7. Reyhler G, Caty G, Vincent A, Billo S, Yombi JC. Validation of the French Version of the World Health Organization Quality of Life HIV Instrument. *PloS One*

1  
2  
3  
4 2013;8(9):e73180.

5  
6 8. Alonso J, Ferrer M, Gandek B, Ware JE Jr, Aaronson NK, Mosconi P, et al.

7  
8 Health-related quality of life associated with chronic conditions in eight countries:  
9 results from the International Quality of Life Assessment (IQOLA) Project. *Qual Life*  
10  
11  
12  
13  
14 *Res* 2004;13(2):283-298.

15  
16 9. O'Connell KA, Skevington SM. An International Quality of Life Instrument to  
17  
18 Assess Well-being in Adults Who are HIV-Positive: A Short Form of the  
19  
20  
21  
22  
23  
24  
25  
26  
27  
28  
29  
30  
31  
32  
33  
34  
35  
36  
37  
38  
39  
40  
41  
42  
43  
44  
45  
46  
47  
48  
49  
50  
51  
52  
53  
54  
55  
56  
57  
58  
59  
60  
WHOQOL-HIV (31 items). *AIDS Behavior* 2012;16(2):452-460.

10. Starace F, Cafaro L, Abrescia N, Chirianni A, Izzo C, Rucci P, et al. Quality of life  
assessment in HIV-positive persons: application and validation of the WHOQOL-HIV,  
Italian version. *AIDS Care* 2002;14(3):405-15.

11. Wu AW. Quality of life assessment comes of age in the era of highly active  
antiretroviral therapy. *AIDS* 2000;14(10):1449-51.

12. Weinfurt KP, Willke RJ, Glick HA, Freimuth WW, Schulman KA. Relationship  
between CD4 Count, Viral Burden, and Quality of Life over Time in HIV-1-Infected  
Patients. *Med Care* 2000;38(4):404-10.

13. Skevington S M, Norweg S, Standage M; WHOQOL HIV group. Predicting  
quality of life for people living with HIV: international evidence from seven cultures.  
*AIDS Care* 2015;22(5):614-622.

14. Mutabazi-Mwesigire D, Katamba A, Martin F, Seeley J, Wu AW. Factors That  
Affect Quality of Life among People Living with HIV Attending an Urban Clinic in  
Uganda: A Cohort Study. *Plos One* 2015;10(6):e0126810.

- 1  
2  
3  
4 15. Nglazi MD, West SJ, Dave JA, Levitt NS, Lambert EV. Quality of life in  
5  
6 individuals living with HIV/AIDS attending a public sector antiretroviral service in  
7  
8 Cape Town, South Africa. *BMC Public Health* 2014;14:676.  
9  
10  
11 16. Nobre N, Pereira M, Sutinen J, Canavarro MC, Sintonen H, Roine RP. Quality of  
12  
13 life of people living with HIV/AIDS: a cross-country comparison study of Finland  
14  
15 and Portugal. *AIDS Care* 2016;28(7):873-7.  
16  
17  
18 17. Balderson BH, Grothaus L, Harrison RG, McCoy K, Mahoney C, Catz S. Chronic  
19  
20 illness burden and quality of life in an aging HIV population. *AIDS Care* 2013;25(4):  
21  
22 451-458.  
23  
24  
25  
26 18. Lubeck DP, Fries JF. Assessment of quality of life in early stage HIV-infected  
27  
28 persons: data from the AIDS Time-Oriented Health Outcome Study (ATHOS). *Qual*  
29  
30 *Life Res* 1997;6(6):494-506.  
31  
32  
33  
34 19. Peterman AH, Cella D, Mo F, McCain N. Psychometric validation of the revised  
35  
36 Functional Assessment of Human Immunodeficiency Virus Infection (FAHI) quality  
37  
38 of life instrument. *Qual Life Res* 1997;6(6):572-584.  
39  
40  
41 20. WHOQOL-HIV Group. Initial steps to developing the World Health  
42  
43 Organization's Quality of Life Instrument (WHOQOL) module for international  
44  
45 assessment in HIV/AIDS. *AIDS Care* 2003;15(3):347-357.  
46  
47  
48  
49 21. Saddki N, Noor MM, Norbanee TH, Rusli MA, Norzila Z, Zaharah S, et al.  
50  
51 Validity and reliability of the Malay version of WHOQOL-HIV BREF in patients with  
52  
53 HIV infection. *AIDS Care* 2009;21(10):1271-8.  
54  
55  
56 22. Bowden A, Fox-Rushby JA. A systematic and critical review of the process of  
57  
58  
59  
60

1  
2  
3  
4 translation and adaptation of generic health-related quality of life measures in Africa,  
5  
6 Asia, Eastern Europe, the Middle East, South America. *Soc Sci Med*  
7  
8 2003;57(7):1289-306.  
9

10  
11 23. O'Connell K, Skevington S, Saxena S; WHOQOL HIV Group. Preliminary  
12  
13 development of the World Health Organisation's quality of life instrument  
14  
15 (WHOQOL-HIV): analysis of the pilot version. *Soc Sci Med* 2003;57(7):1259-75.  
16  
17

18  
19 24. WHOQOL-HIV Group. WHOQOL-HIV for quality of life assessment among  
20  
21 people living with HIV and AIDS: results from the field test. *AIDS Care*  
22  
23 2004;16(7):882-9.  
24  
25

26  
27 25. Cai NQ, Kang J, Xu DL, Hao YT, He LY. Qualitative interview on modification of  
28  
29 WHOQOL-HIV. *J Tra Chin Med* 2012;53(10):839-842. [In Chinese]  
30

31  
32 26. Liu WM, He LY, Wang J, Liu BY, Mark van OMMEREN, Fang JQ, et al. The  
33  
34 introduce and usage of WHOQOL-HIV BREF instrument in Chinese. *Chin J Info*  
35  
36 *Tradit Chin* 2009;16(10):1-2. [In Chinese]  
37  
38

39  
40 27. Fu ST, Tuan YC, Yen MY, Wu WH, Huang CW, Chen WT, et al. Psychometric  
41  
42 properties of the World Health Organization quality of life assessment-brief in  
43  
44 methadone patients: a validation study in northern Taiwan. *Harm Reduct J*  
45  
46 2013;10:37.  
47

48  
49 28. Ming Z, Prybylski D, Cheng F, Airawanwat R, Zhu Q, Liu W, et al. Two-Year  
50  
51 Prospective Cohort Study on Quality of Life Outcomes Among People Living With  
52  
53 HIV After Initiation of Antiretroviral Therapy in Guangxi, China. *J Assoc Nurses*  
54  
55 *AIDS Care* 2014;25(6):603-613.  
56  
57  
58  
59  
60

- 1  
2  
3  
4 29. Huang D, Sangthong R, Mcneil E, Chongsuvivatwong V, Zheng W, Yang X.  
5  
6 Effects of a Phone Call Intervention to Promote Adherence to Antiretroviral Therapy  
7  
8 and Quality of Life of HIV/AIDS Patients in Baoshan, China: A Randomized  
9  
10 Controlled Trial. *AIDS Res Treat* 2013;2013:580974.  
11  
12  
13 30. MM Shoukri, MH Asyali, A Donner. Sample size requirements for the design of  
14  
15 reliability study: Review and new results. *Statistical Methods in Medical Research*  
16  
17 2004;13(4):251-271.  
18  
19  
20 31. CDC. 1993 revised classification system for HIV infection and expanded  
21  
22 surveillance case definition for AIDS among adolescents and adults. *MMWR Recomm*  
23  
24 *Rep* 1992;41(RR-17):1-19.  
25  
26  
27 32. CDC. Comparison of the revised World Health Organization and CDC  
28  
29 surveillance case definitions and staging systems for HIV Infection. *MMWR Recomm*  
30  
31 *Rep* 2008;57(RR10):10-11.  
32  
33  
34 33. Ware J, Sherbourne SD. The MOS 36-item short form health survey (SF-36). 1.  
35  
36 Conceptual frame-work and item selection. *Medical Care* 1992;30(6):473-481.  
37  
38  
39 34. Meng YJ, Li NX, Liu CJ, Chen JH, Song YC, Qian ZS. Quality of life and hostile  
40  
41 mentality trend of patients with HIV/AIDS in China. *Public Health*  
42  
43 2008;122(4):404-11.  
44  
45  
46 35. Bing EG, Hays RD, Jacobson LP, Chen B, Gange SJ, Kass NE, et al.  
47  
48 Health-related quality of life among people with HIV disease: Results from the  
49  
50 Multicenter AIDS Cohort Study. *Qual Life Res* 2000;9(1):55-63.  
51  
52  
53 36. Zhu Y X, Li T, Fan S R, Liu XP, Liang YH, Liu P. Health-related quality of life as  
54  
55  
56  
57  
58  
59  
60

1  
2  
3  
4 measured with the Short-Form 36 (SF-36) questionnaire in patients with recurrent  
5  
6 vulvovaginal candidiasis. *Health Qual Life Outcomes* 2016;14(1):1-6.  
7

8  
9 37. Hays RD, Sherbourne CD, Mazel RM. The RAND 36-Item Health Survey 1.0.  
10  
11 *Health Economics* 1993;2(3):217-27.  
12

13  
14 38. Holmes W, Shea J. Performance of a new, HIV/AIDS-targeted quality of life  
15  
16 (HAT-QoL) instrument in asymptomatic seropositive individuals. *Qual Life Res*  
17  
18 1997;6(6):561-571.  
19

20  
21 39. van Lummel RC, algaard S, Hobert MA, Maetzler W, van Dieën JH,  
22  
23 Galindo-Garre F, et al. Intra-Rater, Inter-Rater and Test-Retest Reliability of an  
24  
25 Instrumented Timed Up and Go (iTUG) Test in Patients with Parkinson's Disease.  
26  
27 *Plos One* 2016;11(3):e0151881.  
28

29  
30 40. Byrne BM. Structural equation modeling with Lisrel, Preliis, and Simplis. Basic  
31  
32 concepts, applications, and programming. *Structural Equation Modeling A*  
33  
34 *Multidisciplinary Journal* 1998;7(4):640-643.  
35  
36

37  
38 41. Yekaninejad MS, Pakpour AH, Tadakamadla J, Kumar S, Mosavi SH, Fridlund B,  
39  
40 et al. Oral-health-related quality of life in patients with cancer: cultural adaptation and  
41  
42 the psychometric testing of the Persian version of EORTC QLQ-OH17. *Support Care*  
43  
44 *Cancer* 2015;23(5):1215-24.  
45  
46

47  
48 42. Jiang XH, Shen ZZ, Zhang NN, Liao HX, Xu HY. Research on  
49  
50 reliability and validity of questionnaire. *Mod Prev Med* 2010;37(3):429-431. [In  
51  
52 Chinese]  
53  
54

55  
56 43. Pereira M, Martins A, Alves S, Canavarro MC. Assessing quality of life in  
57  
58  
59  
60

1  
2  
3  
4 middle-aged and older adults with HIV: psychometric testing of the  
5  
6 WHOQOL-HIV-Bref. *Qual Life Res* 2014;23(9):2473-9.  
7

8  
9 44. Canavarro MC, Pereira M. Factor structure and psychometric properties of the  
10  
11 European Portuguese version of a questionnaire to assess quality of life in  
12  
13 HIV-infected adults: the WHOQOL-HIV-Bref. *AIDS Care* 2012;24(6):799-807.  
14

15  
16 45. Tesfaye M, Olsen MF, Medhin G, Friis H, Hanlon C, Holm L. Adaptation and  
17  
18 validation of the short version WHOQOL-HIV in Ethiopia. *Int J Ment Health Syst*  
19  
20 2016;10:29.  
21

22  
23 46. Chandra PS, Gandhi C, Satishchandra P, Kamat A, Desai A, Ravi V, et al. Quality  
24  
25 of life in HIV subtype C infection among asymptomatic subjects and its association  
26  
27 with CD4 counts and viral loads-a study from South India. *Qual Life Res*  
28  
29 2006;15(10):1597-1605.  
30  
31

32  
33 47. Peltzer K, Phaswanamafuya N. Health-related quality of life in a sample of  
34  
35 HIV-infected South Africans. *Afr J AIDS Res* 2008;7(2):209-218.  
36  
37

38  
39 48. Tran BX. Quality of life outcomes of antiretroviral treatment for HIV/AIDS  
40  
41 patients in Vietnam. *Plos One* 2012;7(7):e41062.  
42

43  
44 49. Zimpel RR, Fleck MP. Quality of life in HIV-positive Brazilians: application and  
45  
46 validation of the WHOQOL-HIV, Brazilian version. *AIDS Care* 2007;19(7):923-30.  
47  
48



1  
2  
3  
4  
5  
6  
7  
8  
9  
10  
11  
12  
13  
14  
15  
16  
17  
18  
19  
20  
21  
22  
23  
24  
25  
26  
27  
28  
29  
30  
31  
32  
33  
34  
35  
36  
37  
38  
39  
40  
41  
42  
43  
44  
45  
46  
47  
48  
49  
50  
51  
52  
53  
54  
55  
56  
57  
58  
59  
60

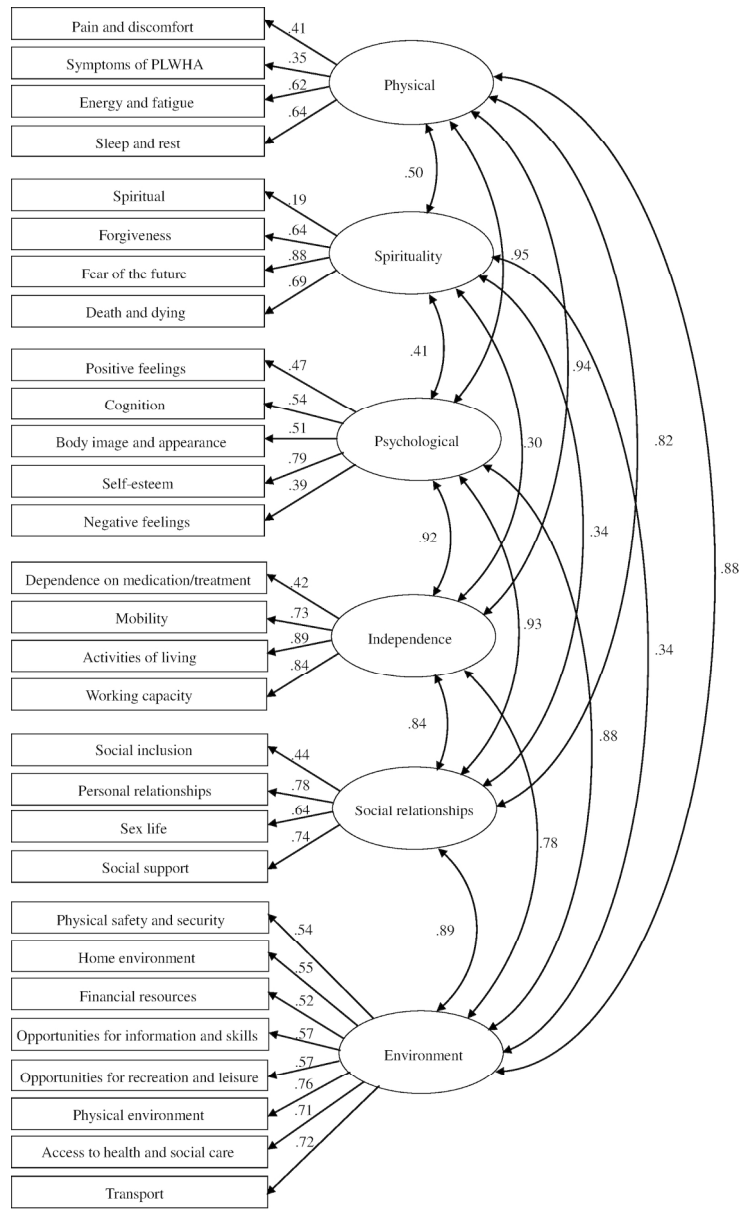

Fig 1. The structure of the Chinese version of the WHOQOL-HIV BREF based on confirmatory factor analysis.

134x222mm (300 x 300 DPI)

STROBE 2007 (v4) Statement—Checklist of items that should be included in reports of *cross-sectional studies*

| Section/Topic                | Item # | Recommendation                                                                                                                                                                       | Reported on page # |
|------------------------------|--------|--------------------------------------------------------------------------------------------------------------------------------------------------------------------------------------|--------------------|
| Title and abstract           | 1      | (a) Indicate the study's design with a commonly used term in the title or the abstract                                                                                               | 2                  |
|                              |        | (b) Provide in the abstract an informative and balanced summary of what was done and what was found                                                                                  | 2, 3               |
| <b>Introduction</b>          |        |                                                                                                                                                                                      |                    |
| Background/rationale         | 2      | Explain the scientific background and rationale for the investigation being reported                                                                                                 | 4, 5               |
| Objectives                   | 3      | State specific objectives, including any prespecified hypotheses                                                                                                                     | 5                  |
| <b>Methods</b>               |        |                                                                                                                                                                                      |                    |
| Study design                 | 4      | Present key elements of study design early in the paper                                                                                                                              | 6, 7               |
| Setting                      | 5      | Describe the setting, locations, and relevant dates, including periods of recruitment, exposure, follow-up, and data collection                                                      | 6, 7               |
| Participants                 | 6      | (a) Give the eligibility criteria, and the sources and methods of selection of participants                                                                                          | 6                  |
| Variables                    | 7      | Clearly define all outcomes, exposures, predictors, potential confounders, and effect modifiers. Give diagnostic criteria, if applicable                                             | 7, 8               |
| Data sources/<br>measurement | 8*     | For each variable of interest, give sources of data and details of methods of assessment (measurement). Describe comparability of assessment methods if there is more than one group | 7, 8               |
| Bias                         | 9      | Describe any efforts to address potential sources of bias                                                                                                                            | 6                  |

|                        |     |                                                                                                                                                                                                              |       |
|------------------------|-----|--------------------------------------------------------------------------------------------------------------------------------------------------------------------------------------------------------------|-------|
| Study size             | 10  | Explain how the study size was arrived at                                                                                                                                                                    | 6, 7  |
| Quantitative variables | 11  | Explain how quantitative variables were handled in the analyses. If applicable, describe which groupings were chosen and why                                                                                 |       |
| Statistical methods    | 12  | (a) Describe all statistical methods, including those used to control for confounding                                                                                                                        | 8, 9  |
|                        |     | (b) Describe any methods used to examine subgroups and interactions                                                                                                                                          | 8, 9  |
|                        |     | (c) Explain how missing data were addressed                                                                                                                                                                  | 8     |
|                        |     | (d) If applicable, describe analytical methods taking account of sampling strategy                                                                                                                           | 6, 7  |
|                        |     | (e) Describe any sensitivity analyses                                                                                                                                                                        | N/A   |
| <b>Results</b>         |     |                                                                                                                                                                                                              |       |
| Participants           | 13* | (a) Report numbers of individuals at each stage of study—eg numbers potentially eligible, examined for eligibility, confirmed eligible, included in the study, completing follow-up, and analysed            | 6, 9  |
|                        |     | (b) Give reasons for non-participation at each stage                                                                                                                                                         | 6     |
|                        |     | (c) Consider use of a flow diagram                                                                                                                                                                           | N/A   |
| Descriptive data       | 14* | (a) Give characteristics of study participants (eg demographic, clinical, social) and information on exposures and potential confounders                                                                     | 9, 10 |
|                        |     | (b) Indicate number of participants with missing data for each variable of interest                                                                                                                          | 6     |
| Outcome data           | 15* | Report numbers of outcome events or summary measures                                                                                                                                                         | 9-19  |
| Main results           | 16  | (a) Give unadjusted estimates and, if applicable, confounder-adjusted estimates and their precision (eg, 95% confidence interval). Make clear which confounders were adjusted for and why they were included | 14-19 |
|                        |     | (b) Report category boundaries when continuous variables were categorized                                                                                                                                    | 9-19  |

|                          |    |                                                                                                                                                                            |                |
|--------------------------|----|----------------------------------------------------------------------------------------------------------------------------------------------------------------------------|----------------|
|                          |    | (c) If relevant, consider translating estimates of relative risk into absolute risk for a meaningful time period                                                           | N/A            |
| Other analyses           | 17 | Report other analyses done—eg analyses of subgroups and interactions, and sensitivity analyses                                                                             | N/A            |
| <b>Discussion</b>        |    |                                                                                                                                                                            |                |
| Key results              | 18 | Summarise key results with reference to study objectives                                                                                                                   | 19, 20, 21, 22 |
| Limitations              | 19 | Discuss limitations of the study, taking into account sources of potential bias or imprecision. Discuss both direction and magnitude of any potential bias                 | 22             |
| Interpretation           | 20 | Give a cautious overall interpretation of results considering objectives, limitations, multiplicity of analyses, results from similar studies, and other relevant evidence | 19, 20, 21, 22 |
| Generalisability         | 21 | Discuss the generalisability (external validity) of the study results                                                                                                      | 22             |
| <b>Other information</b> |    |                                                                                                                                                                            |                |
| Funding                  | 22 | Give the source of funding and the role of the funders for the present study and, if applicable, for the original study on which the present article is based              | 22             |

\*Give information separately for cases and controls in case-control studies and, if applicable, for exposed and unexposed groups in cohort and cross-sectional studies.

**Note:** An Explanation and Elaboration article discusses each checklist item and gives methodological background and published examples of transparent reporting. The STROBE checklist is best used in conjunction with this article (freely available on the Web sites of PLoS Medicine at <http://www.plosmedicine.org/>, Annals of Internal Medicine at <http://www.annals.org/>, and Epidemiology at <http://www.epidem.com/>). Information on the STROBE Initiative is available at [www.strobe-statement.org](http://www.strobe-statement.org).

# BMJ Open

## Psychometric properties of the Chinese version of the WHOQOL-HIV BREF to assess quality of life among people living with HIV/AIDS: A cross-sectional study

|                                 |                                                                                                                 |
|---------------------------------|-----------------------------------------------------------------------------------------------------------------|
| Journal:                        | <i>BMJ Open</i>                                                                                                 |
| Manuscript ID                   | bmjopen-2017-016382.R1                                                                                          |
| Article Type:                   | Research                                                                                                        |
| Date Submitted by the Author:   | 29-May-2017                                                                                                     |
| Complete List of Authors:       | Zhu, Yaxin; China Medical University<br>Liu, Jie; China Medical University<br>Qu, Bo; China Medical University, |
| <b>Primary Subject Heading</b>: | Infectious diseases                                                                                             |
| Secondary Subject Heading:      | HIV/AIDS                                                                                                        |
| Keywords:                       | WHOQOL-HIV BREF, quality of life, psychometric properties, AIDS                                                 |
|                                 |                                                                                                                 |

SCHOLARONE™  
Manuscripts

1  
2  
3  
4 **Psychometric properties of the Chinese version of the WHOQOL-HIV BREF to**  
5  
6 **assess quality of life among people living with HIV/AIDS: A cross-sectional study**  
7

8 Yaxin Zhu<sup>1</sup>, Jie Liu<sup>2</sup>, Bo Qu<sup>2\*</sup>  
9

10  
11 <sup>1</sup>Department of Social Medicine, School of Public Health, China Medical University,  
12  
13 Shenyang, Liaoning Province, P.R. China  
14

15  
16 <sup>2</sup>Department of Health Statistics, School of Public Health, China Medical University,  
17  
18 Shenyang, Liaoning Province, P.R. China  
19

20  
21  
22  
23  
24  
25  
26 \* **Correspondence to:** Bo Qu, M.D., Ph.D., Department of Health Statistics, School  
27  
28 of Public Health, China Medical University, 77 Puhe road, Shenyang North New Area,  
29  
30 Shenyang 110122, People's Republic of China.  
31

32  
33  
34 Tel: 86-24-31939588  
35

36 Fax: 86-24-31939588  
37

38  
39 E-mail: qubo6666@163.com  
40

41  
42  
43  
44 **Keywords:** WHOQOL-HIV BREF; quality of life; psychometric properties; AIDS  
45

46 **Word count:** 3892  
47  
48  
49  
50  
51  
52  
53  
54  
55  
56  
57  
58  
59  
60

## Abstract

**Objectives:** This study aims to assess the psychometric properties of the Chinese version of the WHOQOL-HIV BREF.

**Design:** Cross-sectional study.

**Setting:** Center for Disease Control and Prevention (CDC) and infectious disease hospitals in three Chinese provinces.

**Participants:** Sample of 1100 people living with HIV/AIDS (PLWHA)

**Interventions:** We recruited 1100 PLWHA to evaluate their QOL using the WHOQOL-HIV BREF. Of these participants, 57 were randomly selected to repeat the QOL evaluation 2 weeks later.

**Main outcome measures:** The reliability of the WHOQOL-HIV BREF was assessed in terms of its internal consistency and test-retest reliability. The construct, concurrent, convergent, discriminant, and known-group validity were also analysed. In addition, the factorial invariance across genders was assessed.

**Results:** Cronbach's  $\alpha$  coefficient for the overall scale was 0.93. Except for the spirituality domain, which had an  $\alpha$  below 0.70 (0.66), the other five domains showed adequate internal consistency. The test-retest reliability revealed a statistically significant intraclass correlation coefficient (ICC) of 0.72-0.82 ( $p < 0.001$ ). Confirmatory factor analysis found that the six-domain structure produced an acceptable fit to the data. The instrument showed factorial invariance across gender groups. All domains were significantly correlated with the general items and the SF-36 ( $p < 0.01$ ). The correlation coefficients were  $> 0.40$  ( $r = 0.40-0.67$ ), except for

1  
2  
3  
4 the association between the spirituality domain and two general items (QOL:  $r = 0.33$ ;  
5  
6 health status:  $r = 0.36$ ). Subjects with lower CD4 counts had lower scores for all  
7  
8 domains ( $p < 0.05$ ). Symptomatic participants had significantly lower scores than  
9  
10 asymptomatic participants on the physical, psychological, and independence domains  
11  
12 ( $p < 0.05$ ).

13  
14  
15  
16 **Conclusions:** The WHOQOL-HIV BREF revealed good psychometric characteristics  
17  
18 among Chinese PLWHA. These findings offer promising support for the use of the  
19  
20 WHOQOL-HIV BREF as a measure of QOL among Chinese PLWHA and in  
21  
22 cross-cultural comparative studies on QOL.  
23  
24

#### 25 26 27 28 **Strengths and limitations of this study**

- 29  
30 1. This study offers promising support for the use of the WHOQOL-HIV BREF as a  
31  
32 measure of quality of life (QOL) among Chinese people living with HIV/AIDS  
33  
34 (PLWHA) and in cross-cultural comparative studies on QOL.  
35  
36  
37 2. In our study, the tool's psychometric properties were analysed comprehensively.  
38  
39  
40 3. The study sample was recruited from three provinces encompassing the geographic  
41  
42 diversity of northern, central, and southern China.  
43  
44  
45 4. A longitudinal design might further measure the sensitivity of this instrument to  
46  
47 changes in HIV-related indicators such as CD4 count and HIV stage.  
48  
49  
50  
51  
52  
53  
54  
55  
56  
57  
58  
59  
60



## Introduction

The number of people living with HIV/AIDS (PLWHA) in China increased from 351,709 in 2011<sup>1</sup> to 577,423 in 2015.<sup>2</sup> According to national data, as of February 2016, China had 591,632 PLWHA.<sup>3</sup> Although the number of PLWHA is rising, the fatality rate for AIDS has decreased gradually since 2011 as the result of increasing availability of highly active antiretroviral therapy (HAART).<sup>1</sup> The national epidemic data showed that the number of PLWHA receiving HAART increased from 295,358 in 2014<sup>1</sup> to 382,139 in 2015.<sup>2</sup> The expanded use of HAART has increased the life expectancy of PLWHA.<sup>4,5</sup>

Since the advent of HAART, AIDS has progressed from an acute fatal infection into a manageable chronic disease.<sup>4,6</sup> The evaluation of quality of life (QOL) has proven to be crucial in chronic disease treatment over the past decades.<sup>7,8</sup> Moreover, because AIDS is an incurable disease, PLWHA will continue to suffer from the disease.<sup>7</sup> Thus, QOL assessments have recently become an essential element in AIDS care,<sup>7,9-12</sup> and improving the QOL of PLWHA has become a priority.<sup>13</sup>

In recent years, there has been much research on AIDS-related QOL.<sup>12-17</sup> To better understand and evaluate the QOL of PLWHA, a reliable and valid measurement tool for QOL is important.<sup>7,11</sup> Several instruments have been applied to assess the QOL of PLWHA such as the EQ-5D,<sup>15</sup> SF-36,<sup>17</sup> WHOQOL-HIV BREF,<sup>16</sup> MOS-HIV,<sup>14</sup> AIDS-HAQ,<sup>18</sup> and FAHI.<sup>19</sup> Compared to generic questionnaires, AIDS-specific questionnaires have greater relevance and sensitivity.<sup>20</sup> Reyhler also suggested that disease-specific tools for assessing QOL are of particular relevance for HIV-infected

1  
2  
3 patients.<sup>7</sup> Some instruments have been developed within a single culture, particularly  
4  
5 the Western culture. In addition, versions that have been translated into a different  
6  
7 language often present less equality between the semantics and the concept, as  
8  
9 demonstrated by their poorer psychometric characteristics.<sup>13,21,22</sup> Furthermore,  
10  
11 previous studies have suggested that a cross-culturally valid QOL measure may be  
12  
13 important for assessing health delivery in various cultural conditions.<sup>6,20</sup>  
14  
15  
16  
17  
18

19 In 2003, the WHO developed the WHOQOL-HIV with 120 items (100 generic  
20  
21 items and 20 HIV-related items).<sup>20,23</sup> The WHOQOL-HIV is a multi-dimensional  
22  
23 instrument developed through a multi-national collaboration. Furthermore, the  
24  
25 instrument has been proven by a field test to be promising for assessing QOL in  
26  
27 different cultural contexts.<sup>24</sup> The Chinese version of the WHOQOL-HIV was  
28  
29 developed by the research team from Sun Yat-sen University and China Academy of  
30  
31 Chinese Medical Sciences.<sup>25,26</sup> The translation and cross-cultural adaptation of the  
32  
33 original English version of the WHOQOL-HIV into Chinese were performed  
34  
35 according to the method proposed by the WHO. The implementation of this method  
36  
37 includes the following steps: forward translation, expert panel review,  
38  
39 back-translation, pre-test and cognitive interviews, and formulation of the final  
40  
41 version.<sup>25,26</sup>  
42  
43  
44  
45  
46  
47  
48

49 The WHOQOL-HIV BREF is the short version of the WHOQOL-HIV and includes  
50  
51 31 items covering six domains.<sup>9</sup> Additionally, it has been translated into different  
52  
53 languages and has been proven to be reliable and valid.<sup>9,16,27</sup> Although a few studies  
54  
55 have applied this instrument to Chinese PLWHA,<sup>28,29</sup> its psychometric properties have  
56  
57  
58  
59  
60

1  
2  
3  
4 not been fully assessed. This study was designed to assess the psychometric properties  
5  
6 of the WHOQOL-HIV BREF among Chinese PLWHA. These findings may be of  
7  
8 great importance for better understanding their QOL.  
9

## 10 11 **Materials and Methods**

### 12 13 **Ethics statement**

14  
15  
16 The ethical protocol was obtained from the Bioethics Advisory Commission of  
17  
18 China Medical University. The investigators informed all participants about the  
19  
20 purpose of the study and assured them before the research began that their privacy  
21  
22 would be protected. All subjects provided written informed consent and voluntarily  
23  
24 completed self-administered questionnaires.  
25  
26  
27

### 28 29 **Study population and procedures**

30  
31 A convenience sample was recruited from five cities (Shenyang, Dalian, Dandong,  
32  
33 Zhengzhou, Ningbo) encompassing the geographic diversity of northern, central, and  
34  
35 southern China. Shenyang, Dalian, and Dandong are three cities in the Liaoning  
36  
37 province, which is situated in the northeast region of China. Zhengzhou is the capital  
38  
39 of the Henan province in the central region of China. Ningbo is a city in the Zhejiang  
40  
41 province, which is in the southern region of China. The inclusion criteria were that  
42  
43 participants were 18 years or older, infected with HIV, and without cognitive  
44  
45 impairment. In total, 1201 PLWHA were recruited from local Center for Disease  
46  
47 Control and Prevention (CDC) branches and infectious disease hospitals between  
48  
49 February 2015 and January 2016. All subjects received a self-administered  
50  
51 questionnaire and were compensated with 50 Chinese Yuan after completing the  
52  
53  
54  
55  
56  
57  
58  
59  
60

1  
2  
3  
4 questionnaire. To ensure the quality of the questionnaire, specially trained  
5  
6 investigators inspected the questionnaires after their completion and identified those  
7  
8 that were missing answers or had more than one answer. If > 20% of the responses on  
9  
10 one questionnaire were missing, the questionnaire was considered invalid.  
11  
12 Questionnaires with valid responses were collected from 1100 participants total, and  
13  
14 the valid response rate was 91.6%. Shoukri et al. suggested that the required sample  
15  
16 size for a test-retest reliability study to estimate an ICC of 0.8 and a 95% CI with a  
17  
18 width of 0.2 (i.e., the value of ICC is between 0.7 and 0.9) was 52.<sup>30</sup> To examine the  
19  
20 test-retest reliability, 57 participants were randomly selected to complete the QOL  
21  
22 evaluation again 2 weeks later.  
23  
24  
25  
26  
27

## 28 29 **Questionnaire**

30  
31 The questionnaire comprised four sections including socio-demographic  
32  
33 information, HIV-related characteristics, the WHOQOL-HIV BREF, and the SF-36.  
34  
35 The socio-demographic information included age, gender, and work status. The  
36  
37 HIV-related characteristics consisted of HIV stage, CD4 cell counts, mode of HIV  
38  
39 transmission, and time since diagnosis. As categorized by the clinically meaningful  
40  
41 cut-off points,<sup>31</sup> CD4 cell counts were stratified into three groups. The HIV was  
42  
43 divided into two groups: HIV-asymptomatic and HIV-symptomatic.<sup>13,21,32</sup>  
44  
45  
46  
47  
48

49 The WHOQOL-HIV BREF consisted of 31 items rated on a five-point Likert scale.  
50  
51 Among the 31 items, 29 domain-specific items were used to measure individual QOL  
52  
53 across six domains. The other two items were used to measure participants' perception  
54  
55 of their general QOL and health status. The domain scores were calculated by  
56  
57  
58  
59  
60

1  
2  
3  
4 multiplying the mean of all items within the domain by 4. All domain scores ranged  
5  
6 from 4 to 20. Higher scores in each domain indicated higher QOL for that domain.  
7

8  
9 The SF-36 is a generic QOL measurement tool that has proven to be reliable and  
10  
11 clinically valid for assessing the QOL of PLWHA.<sup>33-36</sup> The SF-36 included 36 items  
12  
13 covering 8 domains, and the domain scores formed two summary scores:<sup>7</sup> the physical  
14  
15 component summary (PCS) and the mental component summary (MCS) scores,  
16  
17 which ranged from 0 to 100.<sup>37,38</sup> Higher scores indicated a better QOL. The reliability  
18  
19 of this instrument in our study was satisfactory, with the alpha equal to 0.93.  
20  
21

## 22 23 24 **Statistical analysis**

25  
26 Missing data were replaced by a median. The mean, standard deviation (SD),  
27  
28 skewness, kurtosis, floor effects, and ceiling effects of each item and domain were  
29  
30 computed. Floor or ceiling effects were significant if the percentage of subjects with  
31  
32 the lowest or the highest score was > 20%.<sup>27,39</sup> A Cronbach's  $\alpha$  coefficient of  $\geq 0.70$   
33  
34 was considered to be an acceptable level of internal consistency. An intraclass  
35  
36 correlation coefficient (ICC) was applied for test-retest reliability, with an ICC  $\geq 0.70$   
37  
38 indicating good test-retest reliability.<sup>40</sup>  
39  
40

41  
42 To test the construct validity, a confirmatory factor analysis (CFA) was used.<sup>41</sup>  
43  
44 Goodness-of-fit was evaluated using the indexes including  $\chi^2$ , root mean square error  
45  
46 of approximation (RMSEA), comparative fit index (CFI), and adjusted  
47  
48 goodness-of-fit index (AGFI). An RMSEA value < 0.08 and a CFI value > 0.90  
49  
50 indicated a good fit.<sup>41</sup> For AGFI, a value > 0.85 was considered to be an adequate  
51  
52 model fit.<sup>41</sup> A multiple-group CFA analysis was conducted to investigate whether the  
53  
54  
55  
56  
57  
58  
59  
60

1  
2  
3  
4 WHOQOL-HIV BREF measured the same constructs across gender groups. First, we  
5  
6 assessed the configural invariance. The next step involved assessing the metric  
7  
8 invariance by examining if the factor loadings were the same across gender groups.  
9  
10 Changes in CFI ( $\Delta\text{CFI} \leq 0.01$ ) were used to demonstrate factorial invariance across  
11  
12 groups.<sup>13,42</sup>

13  
14  
15  
16 Regarding concurrent validity, all domains were correlated with two general items  
17  
18 (QOL and health status) and the SF-36.<sup>7,25</sup> The scale's convergent and discriminant  
19  
20 validity were tested by calculating item-domain Pearson's correlations. A correlation  
21  
22 coefficient  $> 0.4$  for items and their respective domains was considered to be  
23  
24 satisfactory.<sup>7,27</sup> Items revealing correlations with their respective domains that were  
25  
26 higher than those with other domains indicated good discriminant validity.<sup>43</sup>

27  
28  
29  
30  
31 Known-group validity was used to test how well the WHOQOL-HIV BREF  
32  
33 discriminated among the subgroups of participants with regard to CD4 count and HIV  
34  
35 stage. A multivariate analysis of variance (MANOVA) was conducted to analyse the  
36  
37 known-group validity. Post hoc tests were conducted to examine significant  
38  
39 differences in domain scores among the three CD4 groups. It was hypothesized that  
40  
41 HIV-symptomatic participants and PLWHA with lower CD4 counts would have  
42  
43 significantly lower QOL domain scores. Values of  $p < 0.05$  were considered to be  
44  
45 statistically significant. SPSS 19.0 and LISREL 8.5 software for Windows were used.  
46  
47  
48  
49  
50

## 51 **Results**

### 52 **Basic characteristics of the study sample**

53  
54  
55  
56 The mean age of the 1100 participants was 39.62 years, with an SD of 12.73. Most  
57  
58  
59  
60

of the participants were male (965, 87.7%). Of the 1100 participants, 713 (64.8%) were infected with HIV through male homosexual sex. 691 (62.8%) were asymptomatic. The average time since diagnosis was 3.91 years (SD = 2.85). The socio-demographic and HIV-related characteristics are shown in Table 1.

**Table 1. Socio-demographic and HIV-related characteristics of the sample (N = 1100).**

| Characteristic                     | Number | Percentage |
|------------------------------------|--------|------------|
| Gender                             |        |            |
| Male                               | 965    | 87.7%      |
| Female                             | 135    | 12.3%      |
| Work status                        |        |            |
| Employed full-time                 | 643    | 58.4%      |
| Employed part-time                 | 420    | 38.2%      |
| Unemployed                         | 37     | 3.4%       |
| Marital status                     |        |            |
| Single                             | 450    | 40.9%      |
| Married                            | 443    | 40.3%      |
| Divorced/Widowed                   | 207    | 18.8%      |
| Education level                    |        |            |
| Primary school or lower            | 138    | 12.5%      |
| Junior high school                 | 331    | 30.1%      |
| Senior high school                 | 235    | 21.4%      |
| Junior college                     | 184    | 16.7%      |
| College or above                   | 212    | 19.3%      |
| Residence                          |        |            |
| Shenyang                           | 193    | 17.6%      |
| Dalian                             | 205    | 18.6%      |
| Dandong                            | 123    | 11.2%      |
| Zhengzhou                          | 381    | 34.6%      |
| Ningbo                             | 198    | 18.0%      |
| Monthly income (Yuan)              |        |            |
| <1000                              | 222    | 20.2%      |
| 1001–2000                          | 256    | 23.3%      |
| 2001–3000                          | 314    | 28.5%      |
| ≥3001                              | 308    | 28.0%      |
| HIV stage                          |        |            |
| Symptomatic                        | 409    | 37.2%      |
| Asymptomatic                       | 691    | 62.8%      |
| CD4 count (cells/mm <sup>3</sup> ) |        |            |
| <200                               | 99     | 9.0%       |
| 200–499                            | 642    | 58.4%      |

|                          |     |       |
|--------------------------|-----|-------|
| ≥500                     | 359 | 32.6% |
| Mode of HIV transmission |     |       |
| Male homosexual sex      | 713 | 64.8% |
| Heterosexual sex         | 210 | 19.1% |
| Drug abuse               | 11  | 1.0%  |
| Blood product            | 112 | 10.2% |
| Unknown                  | 54  | 4.9%  |

## Score distributions

The descriptive statistics of each item and domain are displayed in Table 2. The skewness and kurtosis coefficients of all items and domains ranged from -1.00 to 1.00, which were acceptable. No significant floor or ceiling effects were found in the six domains. However, the item measuring pain and discomfort showed a significant ceiling effect (35.9%), and floor effects were detected in the items measuring social inclusion (22.4%) and financial resources (24.2%). Across domains, the physical domain had the highest score ( $13.76 \pm 2.94$ ), and the environment domain score was the lowest ( $12.05 \pm 2.88$ ).



**Table 2. Descriptive statistics of the WHOQOL-HIV BREF (N = 1100).**

| Domain or item                     | Mean $\pm$ SD    | Skewness | Kurtosis | Floor (%) | Ceiling (%) |
|------------------------------------|------------------|----------|----------|-----------|-------------|
| General QOL                        | 3.27 $\pm$ 0.92  | -0.18    | 0.5      | 5.0       | 9.8         |
| General health status              | 3.10 $\pm$ 0.94  | -0.09    | -0.09    | 5.2       | 6.6         |
| Physical                           | 13.76 $\pm$ 2.94 | -0.19    | -0.25    | 0.1       | 1.5         |
| Pain and discomfort                | 4.01 $\pm$ 0.99  | -0.98    | 0.46     | 1.8       | 35.9        |
| Symptoms of PLWHA                  | 3.48 $\pm$ 1.08  | -0.49    | -0.64    | 3.9       | 15.3        |
| Energy and fatigue                 | 3.19 $\pm$ 1.19  | -0.02    | -0.91    | 7.9       | 17.6        |
| Sleep and rest                     | 3.08 $\pm$ 1.04  | -0.19    | -0.33    | 8.7       | 8.3         |
| Psychological                      | 12.16 $\pm$ 2.81 | 0.26     | -0.16    | 0.1       | 0.8         |
| Positive feelings                  | 2.83 $\pm$ 1.09  | 0.04     | -0.71    | 12.5      | 5.9         |
| Cognition                          | 2.90 $\pm$ 1.00  | 0.01     | -0.47    | 8.3       | 5.0         |
| Body image and appearance          | 3.07 $\pm$ 1.11  | 0.10     | -0.50    | 8.1       | 13.3        |
| Self-esteem                        | 3.17 $\pm$ 0.98  | -0.25    | -0.18    | 5.8       | 7.4         |
| Negative feelings                  | 3.24 $\pm$ 0.99  | 0.03     | -0.25    | 4.0       | 12.5        |
| Independence                       | 13.19 $\pm$ 2.82 | -0.13    | 0.17     | 0.2       | 1.6         |
| Dependence on medication/treatment | 3.02 $\pm$ 1.12  | 0.07     | -0.78    | 8.3       | 10.7        |
| Mobility                           | 3.57 $\pm$ 0.96  | -0.42    | 0.13     | 3.5       | 17.2        |
| Activities of living               | 3.32 $\pm$ 0.91  | -0.29    | 0.20     | 3.9       | 8.9         |
| Working capacity                   | 3.28 $\pm$ 0.96  | -0.36    | 0.03     | 5.4       | 8.6         |
| Social relationships               | 12.15 $\pm$ 2.91 | -0.02    | 0.16     | 0.9       | 0.9         |
| Social inclusion                   | 2.60 $\pm$ 1.20  | 0.28     | -0.81    | 22.4      | 7.2         |
| Personal relationships             | 3.27 $\pm$ 0.90  | -0.36    | 0.27     | 4.4       | 6.8         |
| Sex life                           | 2.96 $\pm$ 0.94  | -0.23    | 0.04     | 8.5       | 4.2         |
| Social support                     | 3.31 $\pm$ 0.91  | -0.35    | 0.28     | 4.4       | 8.3         |
| Environment                        | 12.05 $\pm$ 2.88 | 0.01     | -0.05    | 0.5       | 0.5         |

|    |                                          |              |       |       |      |      |
|----|------------------------------------------|--------------|-------|-------|------|------|
| 1  |                                          |              |       |       |      |      |
| 2  |                                          |              |       |       |      |      |
| 3  |                                          |              |       |       |      |      |
| 4  |                                          |              |       |       |      |      |
| 5  |                                          |              |       |       |      |      |
| 6  |                                          |              |       |       |      |      |
| 7  | Physical safety and security             | 2.85 ± 1.03  | -0.01 | -0.53 | 10.5 | 4.9  |
| 8  | Home environment                         | 2.97 ± 1.00  | -0.09 | -0.24 | 8.5  | 6.0  |
| 9  | Financial resources                      | 2.54 ± 1.19  | 0.33  | -0.70 | 24.2 | 7.1  |
| 10 | Opportunities for information and skills | 2.95 ± 1.13  | 0.03  | -0.72 | 11.0 | 9.2  |
| 11 | Opportunities for recreation and leisure | 2.89 ± 1.21  | 0.11  | -0.89 | 14.2 | 11.0 |
| 12 | Physical environment                     | 3.25 ± 0.94  | -0.37 | 0.08  | 5.3  | 7.4  |
| 13 | Access to health and social care         | 3.38 ± 1.00  | -0.48 | 0.06  | 6.0  | 11.5 |
| 14 | Transport                                | 3.26 ± 0.94  | -0.31 | 0.08  | 4.9  | 8.2  |
| 15 | Spirituality                             | 13.07 ± 3.44 | -0.32 | -0.41 | 0.8  | 1.0  |
| 16 |                                          |              |       |       |      |      |
| 17 | Spiritual                                | 2.89 ± 1.14  | -0.01 | -0.78 | 13.4 | 7.9  |
| 18 | Forgiveness                              | 3.32 ± 1.23  | -0.22 | -0.84 | 7.5  | 20.2 |
| 19 | Fear of the future                       | 3.39 ± 1.22  | -0.43 | -0.83 | 8.4  | 19.2 |
| 20 | Death and dying                          | 3.46 ± 1.30  | -0.51 | -0.87 | 11.0 | 25.1 |
| 21 |                                          |              |       |       |      |      |
| 22 |                                          |              |       |       |      |      |
| 23 |                                          |              |       |       |      |      |
| 24 |                                          |              |       |       |      |      |
| 25 |                                          |              |       |       |      |      |
| 26 |                                          |              |       |       |      |      |
| 27 |                                          |              |       |       |      |      |
| 28 |                                          |              |       |       |      |      |
| 29 |                                          |              |       |       |      |      |
| 30 |                                          |              |       |       |      |      |
| 31 |                                          |              |       |       |      |      |
| 32 |                                          |              |       |       |      |      |
| 33 |                                          |              |       |       |      |      |
| 34 |                                          |              |       |       |      |      |
| 35 |                                          |              |       |       |      |      |
| 36 |                                          |              |       |       |      |      |
| 37 |                                          |              |       |       |      |      |
| 38 |                                          |              |       |       |      |      |
| 39 |                                          |              |       |       |      |      |
| 40 |                                          |              |       |       |      |      |
| 41 |                                          |              |       |       |      |      |
| 42 |                                          |              |       |       |      |      |
| 43 |                                          |              |       |       |      |      |
| 44 |                                          |              |       |       |      |      |
| 45 |                                          |              |       |       |      |      |
| 46 |                                          |              |       |       |      |      |
| 47 |                                          |              |       |       |      |      |
| 48 |                                          |              |       |       |      |      |
| 49 |                                          |              |       |       |      |      |

## Reliability

The internal consistency was excellent, with an overall Cronbach's  $\alpha$  coefficient of 0.93. The spirituality domain had an  $\alpha$  of 0.66, which was slightly below the cut-off value of 0.70 for acceptable internal consistency. The other five domains were confirmed to have adequate internal consistency. The test-retest reliability showed a statistically significant ICC for all domains. The test-retest values were good, with the ICC ranging from 0.72 (spirituality domain) to 0.82 (independence domain) ( $p < 0.001$ ). The results are reported in Table 3.

**Table 3. Internal consistency and test-retest reliability of the WHOQOL-HIV BREF.**

| Domain               | Cronbach's $\alpha$ coefficient<br>(n = 1100) | ICC (95% CI)<br>(n = 57) |
|----------------------|-----------------------------------------------|--------------------------|
| Physical             | 0.71                                          | 0.76 (0.63–0.85)***      |
| Psychological        | 0.70                                          | 0.73 (0.57–0.83)***      |
| Independence         | 0.85                                          | 0.82 (0.71–0.89)***      |
| Social relationships | 0.71                                          | 0.80 (0.69–0.88)***      |
| Environment          | 0.83                                          | 0.74 (0.59–0.84)***      |
| Spirituality         | 0.66                                          | 0.72 (0.56–0.82)***      |

\*\*\*  $p < 0.001$

## Construct validity

The CFA results showed that the six-domain structure of the WHOQOL-HIV BREF produced an acceptable fit to the data ( $\chi^2 = 5662.69$ ,  $df = 362$ ,  $p < 0.001$ ; CFI = 0.81; RMSEA = 0.07 [90% CI: 0.04-0.08]; AGFI = 0.87). Except for the item measuring spiritual, the factor load of each item with its respective domain was acceptable, ranging from 0.35 to 0.89, as shown in Figure 1.

**Fig 1. The structure of the Chinese version of the WHOQOL-HIV BREF based on confirmatory factor analysis.**

The six-factor structure of the WHOQOL-HIV BREF was tested across gender groups to evaluate factorial invariance. The results of configural invariance showed the invariance of the factor structure across gender groups:  $\chi^2 = 6982.87$ ,  $p < 0.001$ , CFI = 0.808, and RMSEA = 0.072. The findings for metric invariance showed that the factor loadings were the same across gender groups:  $\chi^2 = 6960.17$ ,  $p < 0.001$ , CFI = 0.809, and RMSEA = 0.073. In addition, the change of CFI was 0.001, which was lower than 0.01. The Chinese version of the WHOQOL-HIV BREF showed factorial invariance for PLWHA across gender groups.

### Concurrent validity

The correlation coefficients of all domains with the two general measures (general QOL and general health status) and two component summary scores of the SF-36 (PCS and MCS) are displayed in Table 4. All domains correlated with both general QOL and health status significantly ( $p < 0.01$ ). The correlation coefficients were  $> 0.40$  ( $r = 0.44-0.57$ ), with the exception of the association between the spirituality domain and the two items (QOL:  $r = 0.33$ ; health status:  $r = 0.36$ ). In addition, the coefficients between all domains and two component summary scores were  $> 0.40$  ( $r = 0.40-0.67$ ,  $p < 0.01$ ). Generally, these results indicated satisfactory concurrent validity of the WHOQOL-HIV BREF.

**Table 4. Concurrent validity of the WHOQOL-HIV BREF (N = 1100).**

| Domain               | Correlation coefficient |                       |        |        |
|----------------------|-------------------------|-----------------------|--------|--------|
|                      | General QOL             | General health status | PCS    | MCS    |
| Physical             | 0.56**                  | 0.54**                | 0.67** | 0.66** |
| Psychological        | 0.54**                  | 0.50**                | 0.55** | 0.62** |
| Independence         | 0.57**                  | 0.53**                | 0.63** | 0.61** |
| Social relationships | 0.47**                  | 0.44**                | 0.46** | 0.49** |
| Environment          | 0.53**                  | 0.46**                | 0.49** | 0.52** |

|              |        |        |        |        |
|--------------|--------|--------|--------|--------|
| Spirituality | 0.33** | 0.36** | 0.40** | 0.49** |
|--------------|--------|--------|--------|--------|

\*\*  $p < 0.01$ ; PCS, physical component summary; MCS, mental component summary.

## Convergent and discriminant validity

Concerning item-domain correlations, each item correlated with its respective domain score, and  $r$  coefficients ranged from 0.47 to 0.84 ( $p < 0.01$ ). With regard to discriminant validity, the majority of items revealed a higher correlation with their respective domains than with other domains ( $p < 0.01$ ). However, the item “spiritual” showed a higher correlation with the psychological domain ( $r = 0.65$ ,  $p < 0.01$ ) than with its respective (i.e., spirituality) domain ( $r = 0.50$ ,  $p < 0.01$ ). Generally, convergent and discriminant validity were considered to be good (Table 5).

**Table 5. Convergent and discriminant validity of the WHOQOL-HIV BREF (N = 1100).**

| Domain               | Correlation coefficient range |                       | Convergent validity |                | Discriminant validity |                |
|----------------------|-------------------------------|-----------------------|---------------------|----------------|-----------------------|----------------|
|                      | Convergent validity           | Discriminant validity | Success/total       | Percentage (%) | Success/total         | Percentage (%) |
| Physical             | 0.66–0.72**                   | 0.24–0.66**           | 4/4                 | 100            | 4/4                   | 100            |
| Psychological        | 0.57–0.73**                   | 0.15–0.67**           | 5/5                 | 100            | 5/5                   | 100            |
| Independence         | 0.47–0.84**                   | 0.02–0.68**           | 4/4                 | 100            | 4/4                   | 100            |
| Social relationships | 0.68–0.78**                   | 0.26–0.57**           | 4/4                 | 100            | 4/4                   | 100            |
| Environment          | 0.65–0.72**                   | 0.19–0.64**           | 8/8                 | 100            | 8/8                   | 100            |
| Spirituality         | 0.50–0.84**                   | 0.14–0.65**           | 4/4                 | 100            | 3/4                   | 75             |

\*\*  $p < 0.01$

## Known-group validity

A significant multivariate effect was found for CD4 counts (Wilks'  $\lambda = 0.956$ ,  $F(12, 2184) = 4.12$ ,  $p < 0.001$ ,  $\eta_p^2 = 0.022$ ). Subsequent univariate  $F$ -tests, which are shown in Table 6, indicated that all six domains contributed to the multivariate effect. Among the three groups divided by CD4 count, the mean scores for the six domains in group C (CD4 count  $\geq 500$  cells/mm<sup>3</sup>) were the highest, and the subjects with a CD4 count  $< 200$  cells/mm<sup>3</sup> showed the lowest scores ( $p < 0.05$ ).

**Table 6. Known-group validity for subgroups of participants by CD4 count ( $N = 1100$ ).**

| Domain                              | Group A<br>( $<200$<br>cells/mm <sup>3</sup> ) | Group B<br>(200–499<br>cells/mm <sup>3</sup> ) | Group C<br>( $\geq 500$<br>cells/mm <sup>3</sup> ) | $F$                  | $\eta_p^2$ |
|-------------------------------------|------------------------------------------------|------------------------------------------------|----------------------------------------------------|----------------------|------------|
| Physical <sup>abc</sup>             | 12.63 $\pm$ 2.56                               | 13.63 $\pm$ 2.97                               | 14.30 $\pm$ 2.87                                   | 14.34 <sup>***</sup> | 0.025      |
| Psychological <sup>abc</sup>        | 11.01 $\pm$ 2.29                               | 12.05 $\pm$ 2.75                               | 12.68 $\pm$ 2.93                                   | 15.24 <sup>***</sup> | 0.027      |
| Social relationships <sup>abc</sup> | 11.32 $\pm$ 2.32                               | 11.99 $\pm$ 2.92                               | 12.65 $\pm$ 2.96                                   | 10.43 <sup>***</sup> | 0.019      |
| Independence <sup>abc</sup>         | 12.09 $\pm$ 2.50                               | 13.03 $\pm$ 2.86                               | 13.77 $\pm$ 2.72                                   | 16.50 <sup>***</sup> | 0.029      |
| Environment <sup>bc</sup>           | 11.49 $\pm$ 2.33                               | 11.93 $\pm$ 2.81                               | 12.40 $\pm$ 3.10                                   | 5.09 <sup>**</sup>   | 0.009      |
| Spirituality <sup>c</sup>           | 12.39 $\pm$ 2.86                               | 12.98 $\pm$ 3.46                               | 13.40 $\pm$ 3.51                                   | 3.81 <sup>*</sup>    | 0.007      |

\*  $p < 0.05$ ; \*\*  $p < 0.01$ ; \*\*\*  $p < 0.001$

<sup>a</sup>Group A significantly different from Group B.

<sup>b</sup>Group B significantly different from Group C.

<sup>c</sup>Group A significantly different from Group C.

Regarding HIV stage, the multivariate effect was also significant (Wilks'  $\lambda = 0.924$ ,  $F(6, 1093) = 6.92$ ,  $p < 0.001$ ,  $\eta_p^2 = 0.076$ ), and follow-up tests indicated that the symptomatic participants had significantly lower scores than asymptomatic participants in the physical (13.54  $\pm$  3.03), psychological (11.69  $\pm$  2.78), and independence (12.75  $\pm$  2.73) domains ( $p < 0.05$ , see Table 7).

**Table 7. Known-group validity for subgroups of participants by HIV stage ( $N = 1100$ ).**

| Domain   | Symptomatic      | Asymptomatic     | $F$               | $\eta_p^2$ |
|----------|------------------|------------------|-------------------|------------|
| Physical | 13.54 $\pm$ 3.03 | 14.10 $\pm$ 3.00 | 4.11 <sup>*</sup> | 0.008      |

|                      |              |            |                      |       |
|----------------------|--------------|------------|----------------------|-------|
| Psychological        | 11.69 ± 2.78 | 12.70±2.81 | 15.43 <sup>***</sup> | 0.029 |
| Social relationships | 12.02 ± 3.03 | 12.42±2.77 | 2.39                 | 0.005 |
| Independence         | 12.75 ± 2.73 | 13.56±2.78 | 10.28 <sup>**</sup>  | 0.020 |
| Environment          | 12.01 ± 2.87 | 12.42±2.85 | 2.49                 | 0.005 |
| Spirituality         | 13.62 ± 3.17 | 13.07±3.58 | 3.07                 | 0.006 |

\*  $p < 0.05$ ; \*\*  $p < 0.01$ ; \*\*\*  $p < 0.001$

## Discussion

Our results suggested that the WHOQOL-HIV BREF is reliable and valid for Chinese PLWHA. The skewness and kurtosis coefficients of all items and domains were in the acceptable range (-1.00 to 1.00), which was a similar result to previous studies conducted among Taiwanese HIV-infected patients and ageing Portuguese patients with HIV.<sup>6,44</sup> In line with other studies,<sup>6,44</sup> the ceiling effect of the item measuring pain and discomfort was above the accepted threshold of 20%. It is likely that the ceiling effect is dependent on population distribution.<sup>44</sup> Although previous studies have not reported the floor effects of the WHOQOL-HIV BREF,<sup>6,7,21,44</sup> we detected floor effects for two items (social inclusion and financial resources).

Except for the spirituality domain, all domains showed satisfactory reliability. The results are consistent with other reliability studies in Malaysia, Portugal, and Ethiopia.<sup>21,44-46</sup> Saddki and Pereira suggested that the content and size of the spirituality domain could result in lower reliability.<sup>21,44</sup> Tesfaye et al. noted that the limitations of the spirituality domain in this instrument should be acknowledged.<sup>46</sup> Chandra also indicated that the spirituality domain in the WHOQOL-HIV BREF may be inadequate, and he suggested that having more items in the spirituality domain on the WHOQOL-HIV could increase sensitivity in this regard.<sup>47</sup> We also found that the WHOQOL-HIV BREF has satisfactory test-retest reliability, which is consistent with



1  
2  
3  
4 the French version.<sup>7</sup>  
5

6 The results of the CFA suggested that the original six-domain structure could  
7  
8 provide a generally good fit for our study data, which is consistent with other studies  
9  
10 using the WHOQOL-HIV BREF.<sup>9,44,46</sup> However, the exploratory factor analysis (EFA)  
11  
12 of the WHOQOL-HIV BREF conducted with Portuguese and Malaysian HIV-positive  
13  
14 patients yielded a five-factor model, which contradicts the original six-domain  
15  
16 model.<sup>21,45</sup> In addition to the EFA, Canavarro also conducted a CFA of the  
17  
18 WHOQOL-HIV BREF and found that both the five-factor model and the original  
19  
20 six-domain model fit relatively well.<sup>45</sup> Moreover, Peltzer's results from a multivariate  
21  
22 logistic regression showed that four domains (psychological, independence,  
23  
24 environment, and spirituality) were major predictors of overall QOL.<sup>48</sup> Some studies  
25  
26 have suggested that the original model fit would improve if some items were  
27  
28 modified.<sup>45,46</sup> The factor load of the spiritual item with its respective domain (i.e.,  
29  
30 "Spirituality" domain) was 0.11, which was much lower than others. As previously  
31  
32 suggested, we reassigned this item to the "Psychological" domain in our study and  
33  
34 then assessed the construct validity again. The result showed that the factor load of  
35  
36 the spiritual item with the "Psychological" domain was 0.67, and the model fit also  
37  
38 improved, with a CFI = 0.87, RMSEA = 0.07 (90% CI: 0.05-0.08), and AGFI = 0.89.  
39  
40  
41  
42  
43  
44  
45  
46  
47  
48

49 Concurrent validity was demonstrated by the significant correlations between two  
50  
51 general items and the SF-36. All domains correlated significantly with self-perceived  
52  
53 general QOL ( $r = 0.33-0.57, p < 0.01$ ), health status ( $r = 0.36-0.54, p < 0.01$ ), and two  
54  
55 component summary scores of the SF-36 ( $r = 0.40-0.67, p < 0.01$ ). The correlation  
56  
57  
58  
59  
60

1  
2  
3  
4 coefficient was comparable to that reported in the validation study of the Malay  
5  
6 version<sup>21</sup> but was somewhat lower than the results of other validation studies of the  
7  
8 WHOQOL-HIV BREF.<sup>7,44</sup> It was noted that the spirituality domain showed the lowest  
9  
10 correlation with the general QOL ( $r = 0.33, p < 0.01$ ) and health status ( $r = 0.36, p <$   
11  
12  $0.01$ ). This finding is consistent with results found by Saddki.<sup>21</sup> More specifically,  
13  
14 regarding the findings related to discriminant validity, the item measuring spirituality  
15  
16 showed a higher correlation with the psychological domain ( $r = 0.65, p < 0.01$ ) than  
17  
18 with its initially assigned domain (i.e., spirituality;  $r = 0.50, p < 0.01$ ). Canavarro also  
19  
20 found this correlation in the European Portuguese version, and he suggested that this  
21  
22 item should be modified or reassigned to the psychological domain.<sup>45</sup>  
23  
24  
25  
26  
27  
28

29 Demonstrating its known-group validity, the WHOQOL-HIV BREF discriminated  
30  
31 between the CD4 count groups ( $p < 0.05$ ), which is consistent with previous  
32  
33 studies.<sup>45,49</sup> We also observed that the subjects with higher CD4 counts reported better  
34  
35 QOL. This was also observed by other researchers.<sup>47,48</sup> However, Pereira indicated  
36  
37 that domain scores were not significantly different across CD4 counts among ageing  
38  
39 adults with HIV, and he implied that associations between biological markers and  
40  
41 QOL may conflict.<sup>44</sup> Another result was that the physical, psychological, and  
42  
43 independence domains discriminated relatively well between symptomatic and  
44  
45 asymptomatic PLWHA ( $p < 0.05$ ). A multinational pilot study also showed that the  
46  
47 physical and independence domains discriminated better than other domains between  
48  
49 different stages of HIV disease progression.<sup>9</sup> The failure of the spirituality domain to  
50  
51 discriminate between PLWHA in 2 HIV stages may imply that although AIDS is now  
52  
53  
54  
55  
56  
57  
58  
59  
60

1  
2  
3  
4 a nonfatal disease, the extent of suffering from the related emotional distress remains  
5  
6 similar at different HIV stages.<sup>21</sup> A previous study suggested that due to problems  
7  
8 with understanding, the "safety and security" item could not discriminate between  
9  
10 symptomatic and asymptomatic PLWHA.<sup>46</sup> This may partly explain the failure of the  
11  
12 environment domain. The social relationships domain may face the same problems,  
13  
14 and further studies are needed to clarify this point. Other studies have found that the  
15  
16 WHOQOL-HIV BREF has good validity with respect to disease stage, and  
17  
18 asymptomatic PLWHA have better QOL than do symptomatic subjects.<sup>15,49</sup>  
19  
20  
21  
22

23  
24 There are limitations to this study that should be acknowledged. First, potential  
25  
26 limitations are introduced by convenience sampling and self-administration of an  
27  
28 assessment. All subjects were enrolled by convenience, and the self-administered  
29  
30 assessment resulted in the exclusion of PLWHA with difficulty reading, which may  
31  
32 have made the sample not representative of Chinese PLWHA. Second, various  
33  
34 methods of administering the questionnaire such as self-administered and  
35  
36 interviewer-administered methods should have been applied to assess its technical  
37  
38 validity. Third, the difference of mean QOL between CD4 count subgroups are  
39  
40 small but statistically significant. A longitudinal design might further measure the  
41  
42 sensitivity of this instrument to changes in HIV-related indicators such as CD4 count  
43  
44 and HIV stage; this improved sensitivity could clarify whether the difference is  
45  
46 clinically meaningful. In addition, the percentage of missing values per item ranged  
47  
48 from 0.2% to 2.3%. Missing values were imputed as the median score of those who  
49  
50 answered the item. As a result, the estimated variances underestimated the variances  
51  
52  
53  
54  
55  
56  
57  
58  
59  
60

1  
2  
3 of the underlying distributions. Furthermore, there may be some problems in the  
4  
5  
6 spirituality domain, and the next step of our research should be to assess the  
7  
8  
9 psychometric properties again after translating and modifying this domain.

## 10 11 **Conclusions**

12  
13 The WHOQOL-HIV BREF revealed good psychometric characteristics among  
14  
15 Chinese PLWHA. These findings offer promising support for the use of the  
16  
17 WHOQOL-HIV BREF as a measure of QOL among Chinese PLWHA and in  
18  
19 cross-cultural comparative studies on QOL. Further studies on the spirituality domain  
20  
21 should be conducted to ensure the effectiveness of the WHOQOL-HIV BREF.  
22  
23  
24

## 25 26 **Acknowledgments**

27  
28 The authors wish to thank Shijie Liang, Xia Min, and Li Wang for help with sample  
29  
30 collection. We thank all the PLWHA participants in this study.  
31  
32

## 33 34 **Competing Interests**

35  
36 The authors declare that they have no competing interests.  
37

## 38 39 **Funding**

40  
41 This work was supported by National Natural Science Foundation of China, grant  
42  
43 number 71473269 and 71673301. The funders had no role in study design, data  
44  
45 collection and analysis, decision to publish, or preparation of the manuscript.  
46

## 47 48 **Author contributions**

49  
50 BQ designed the research. YXZ and JL participated in the data collection and analysis.  
51  
52 YXZ wrote the manuscript. All authors read and approved the final manuscript.  
53  
54

## 55 56 **Ethics approval**

1  
2  
3  
4 Ethical protocol was obtained from the Bioethics Advisory Commission of China  
5  
6 Medical University. All of the subjects provided written informed consent and  
7  
8 voluntarily completed self-administered questionnaires.  
9

## 10 11 **Data sharing statement**

12  
13 All data from the current study were reported in the manuscript. Participant-level data  
14  
15 are not publicly available due to ethical and legal obligations to the participants in the  
16  
17 study. Data are available upon request to the corresponding author and with  
18  
19 permission of the local ethics committee.  
20

## 21 22 **References**

- 23  
24  
25  
26 1. National Health and Family Planning Commission of the People's Republic of  
27  
28 China. 2015 China AIDS Response Progress Report. May 2015. Available:  
29  
30 [http://www.aidsdatahub.org/sites/default/files/publication/China\\_narrative\\_report\\_201](http://www.aidsdatahub.org/sites/default/files/publication/China_narrative_report_2015.pdf)  
31  
32 [5.pdf](http://www.aidsdatahub.org/sites/default/files/publication/China_narrative_report_2015.pdf). Accessed 16 January 2016.  
33  
34  
35  
36 2. NCAIDS, NCSTD, China CDC. Update on the AIDS/STD epidemic in China and  
37  
38 main response in control and prevention in December, 2015. *Chin J AIDS STD*  
39  
40 2016;22(2):69. [In Chinese]  
41  
42  
43 3. NCAIDS, NCSTD, China CDC. Update on the AIDS/STD epidemic in China and  
44  
45 main response in control and prevention in February, 2016. *Chin J AIDS STD*  
46  
47 2016;22(4):223. [In Chinese]  
48  
49  
50 4. Mutabazi-Mwesigire D, Seeley J, Martin F, Katamba A. Perceptions of quality of  
51  
52 life among Ugandan patients living with HIV: a qualitative study. *BMC Public Health*  
53  
54 2014;14:343.  
55  
56  
57  
58  
59  
60

- 1  
2  
3  
4 5. Mwesigire DM, Martin F, Seeley J, Katamba A. Relationship between CD4 count  
5  
6 and quality of life over time among HIV patients in Uganda: a cohort study. *Health*  
7  
8 *Qual Life Outcomes* 2015;13:144.
- 9  
10  
11 6. Hsiung PC, Fang CT, Wu CH, Sheng WH, Chen SC, Wang JD, et al. Validation of  
12  
13 the WHOQOL-HIV BREF among HIV-infected patients in Taiwan. *AIDS Care* 2011;  
14  
15 23(8):1035-42.
- 16  
17  
18 7. Reyhler G, Caty G, Vincent A, Billo S, Yombi JC. Validation of the French Version  
19  
20 of the World Health Organization Quality of Life HIV Instrument. *PloS One*  
21  
22 2013;8(9):e73180.
- 23  
24  
25 8. Alonso J, Ferrer M, Gandek B, Ware JE Jr, Aaronson NK, Mosconi P, et al.  
26  
27 Health-related quality of life associated with chronic conditions in eight countries:  
28  
29 results from the International Quality of Life Assessment (IQOLA) Project. *Qual Life*  
30  
31 *Res* 2004;13(2):283-298.
- 32  
33  
34 9. O'Connell KA, Skevington SM. An International Quality of Life Instrument to  
35  
36 Assess Well-being in Adults Who are HIV-Positive: A Short Form of the  
37  
38 WHOQOL-HIV (31 items). *AIDS Behavior* 2012;16(2):452-460.
- 39  
40  
41 10. Starace F, Cafaro L, Abrescia N, Chirianni A, Izzo C, Rucci P, et al. Quality of life  
42  
43 assessment in HIV-positive persons: application and validation of the WHOQOL-HIV,  
44  
45 Italian version. *AIDS Care* 2002;14(3):405-15.
- 46  
47  
48 11. Wu AW. Quality of life assessment comes of age in the era of highly active  
49  
50 antiretroviral therapy. *AIDS* 2000;14(10):1449-51.
- 51  
52  
53 12. Weinfurt KP, Willke RJ, Glick HA, Freimuth WW, Schulman KA. Relationship  
54  
55  
56  
57  
58  
59  
60

1  
2  
3  
4 between CD4 Count, Viral Burden, and Quality of Life over Time in HIV-1-Infected  
5  
6 Patients. *Med Care* 2000;38(4):404-10.

7  
8  
9 13. Skevington SM, Norweg S, Standage M; WHOQOL HIV group. Predicting  
10  
11 quality of life for people living with HIV: international evidence from seven cultures.  
12  
13 *AIDS Care* 2015;22(5):614-622.

14  
15  
16 14. Mutabazi-Mwesigire D, Katamba A, Martin F, Seeley J, Wu AW. Factors That  
17  
18 Affect Quality of Life among People Living with HIV Attending an Urban Clinic in  
19  
20 Uganda: A Cohort Study. *Plos One* 2015;10(6):e0126810.

21  
22  
23 15. Nglazi MD, West SJ, Dave JA, Levitt NS, Lambert EV. Quality of life in  
24  
25 individuals living with HIV/AIDS attending a public sector antiretroviral service in  
26  
27 Cape Town, South Africa. *BMC Public Health* 2014;14:676.

28  
29  
30 16. Nobre N, Pereira M, Sutinen J, Canavarro MC, Sintonen H, Roine RP. Quality of  
31  
32 life of people living with HIV/AIDS: a cross-country comparison study of Finland  
33  
34 and Portugal. *AIDS Care* 2016;28(7):873-7.

35  
36  
37 17. Balderson BH, Grothaus L, Harrison RG, McCoy K, Mahoney C, Catz S. Chronic  
38  
39 illness burden and quality of life in an aging HIV population. *AIDS Care* 2013;25(4):  
40  
41 451-458.

42  
43  
44 18. Lubeck DP, Fries JF. Assessment of quality of life in early stage HIV-infected  
45  
46 persons: data from the AIDS Time-Oriented Health Outcome Study (ATHOS). *Qual*  
47  
48 *Life Res* 1997;6(6):494-506.

49  
50  
51 19. Peterman AH, Cella D, Mo F, McCain N. Psychometric validation of the revised  
52  
53 Functional Assessment of Human Immunodeficiency Virus Infection (FAHI) quality  
54  
55  
56  
57  
58  
59  
60

1  
2  
3  
4 of life instrument. *Qual Life Res* 1997;6(6):572-584.

5  
6 20. WHOQOL-HIV Group. Initial steps to developing the World Health  
7  
8 Organization's Quality of Life Instrument (WHOQOL) module for international  
9  
10 assessment in HIV/AIDS. *AIDS Care* 2003;15(3):347-357.

11  
12  
13 21. Saddki N, Noor MM, Norbanee TH, Rusli MA, Norzila Z, Zaharah S, et al.  
14  
15 Validity and reliability of the Malay version of WHOQOL-HIV BREF in patients with  
16  
17 HIV infection. *AIDS Care* 2009;21(10):1271-8.

18  
19  
20  
21 22. Bowden A, Fox-Rushby JA. A systematic and critical review of the process of  
22  
23 translation and adaptation of generic health-related quality of life measures in Africa,  
24  
25 Asia, Eastern Europe, the Middle East, South America. *Soc Sci Med*  
26  
27 2003;57(7):1289-306.

28  
29  
30  
31 23. O'Connell K, Skevington S, Saxena S; WHOQOL HIV Group. Preliminary  
32  
33 development of the World Health Organisation's quality of life instrument  
34  
35 (WHOQOL-HIV): analysis of the pilot version. *Soc Sci Med* 2003;57(7):1259-75.

36  
37  
38  
39 24. WHOQOL-HIV Group. WHOQOL-HIV for quality of life assessment among  
40  
41 people living with HIV and AIDS: results from the field test. *AIDS Care*  
42  
43 2004;16(7):882-9.

44  
45  
46 25. Cai NQ, Kang J, Xu DL, Hao YT, He LY. Qualitative interview on modification of  
47  
48 WHOQOL-HIV. *J Tra Chin Med* 2012;53(10):839-842. [In Chinese]

49  
50  
51 26. Liu WM, He LY, Wang J, Liu BY, Mark van OMMEREN, Fang JQ, et al. The  
52  
53 introduce and usage of WHOQOL-HIV BREF instrument in Chinese. *Chin J Info*  
54  
55 *Tradit Chin* 2009;16(10):1-2. [In Chinese]



- 1  
2  
3  
4 27. Fu ST, Tuan YC, Yen MY, Wu WH, Huang CW, Chen WT, et al. Psychometric  
5 properties of the World Health Organization quality of life assessment-brief in  
6 methadone patients: a validation study in northern Taiwan. *Harm Reduct J*  
7  
8 2013;10:37.  
9  
10  
11  
12  
13 28. Ming Z, Prybylski D, Cheng F, Airawanwat R, Zhu Q, Liu W, et al. Two-Year  
14 Prospective Cohort Study on Quality of Life Outcomes Among People Living With  
15 HIV After Initiation of Antiretroviral Therapy in Guangxi, China. *J Assoc Nurses*  
16  
17  
18  
19  
20  
21  
22  
23  
24 29. Huang D, Sangthong R, Mcneil E, Chongsuvivatwong V, Zheng W, Yang X.  
25 Effects of a Phone Call Intervention to Promote Adherence to Antiretroviral Therapy  
26 and Quality of Life of HIV/AIDS Patients in Baoshan, China: A Randomized  
27  
28  
29  
30  
31  
32  
33  
34 30. MM Shoukri, MH Asyali, A Donner. Sample size requirements for the design of  
35 reliability study: Review and new results. *Statistical Methods in Medical Research*  
36  
37  
38  
39  
40  
41  
42  
43  
44 31. CDC. 1993 revised classification system for HIV infection and expanded  
45 surveillance case definition for AIDS among adolescents and adults. *MMWR Recomm*  
46  
47  
48  
49  
50  
51  
52  
53  
54 32. CDC. Comparison of the revised World Health Organization and CDC  
55 surveillance case definitions and staging systems for HIV Infection. *MMWR Recomm*  
56  
57  
58  
59  
60 33. Ware J, Sherbourne SD. The MOS 36-item short form health survey (SF-36). 1.

- 1  
2  
3  
4 Conceptual frame-work and item selection. *Medical Care* 1992;30(6):473-481.
- 5  
6 34. Meng YJ, Li NX, Liu CJ, Chen JH, Song YC, Qian ZS. Quality of life and hostile  
7  
8 mentality trend of patients with HIV/AIDS in China. *Public Health*  
9  
10 2008;122(4):404-11.
- 11  
12  
13 35. Bing EG, Hays RD, Jacobson LP, Chen B, Gange SJ, Kass NE, et al.  
14  
15 Health-related quality of life among people with HIV disease: Results from the  
16  
17 Multicenter AIDS Cohort Study. *Qual Life Res* 2000;9(1):55-63.
- 18  
19  
20  
21 36. Liu C, Ostrow D, Detels R, Hu Z, Johnson L, Kingsley L, et al. Impacts of HIV  
22  
23 infection and HAART use on quality of life. *Quality of Life Research*  
24  
25 2006;15(6):941-949.
- 26  
27  
28  
29 37. Zhu Y X, Li T, Fan S R, Liu XP, Liang YH, Liu P. Health-related quality of life as  
30  
31 measured with the Short-Form 36 (SF-36) questionnaire in patients with recurrent  
32  
33 vulvovaginal candidiasis. *Health Qual Life Outcomes* 2016;14(1):1-6.
- 34  
35  
36 38. Hays RD, Sherbourne CD, Mazel RM. The RAND 36-Item Health Survey 1.0.  
37  
38  
39 *Health Economics* 1993;2(3):217-27.
- 40  
41  
42 39. Holmes W, Shea J. Performance of a new, HIV/AIDS-targeted quality of life  
43  
44 (HAT-QoL) instrument in asymptomatic seropositive individuals. *Qual Life Res*  
45  
46 1997;6(6):561-571.
- 47  
48  
49 40. van Lummel RC, algaard S, Hobert MA, Maetzler W, van Dieën JH,  
50  
51 Galindo-Garre F, et al. Intra-Rater, Inter-Rater and Test-Retest Reliability of an  
52  
53 Instrumented Timed Up and Go (iTUG) Test in Patients with Parkinson's Disease.  
54  
55  
56  
57 *Plos One* 2016;11(3):e0151881.
- 58  
59  
60

- 1  
2  
3  
4 41. Byrne BM. Structural equation modeling with Lisrel, Prelis, and Simplis. Basic  
5 concepts, applications, and programming. *Structural Equation Modeling A*  
6 *Multidisciplinary Journal* 1998;7(4):640-643.  
7  
8  
9  
10  
11 42. Yekaninejad MS, Pakpour AH, Tadakamadla J, Kumar S, Mosavi SH, Fridlund B,  
12 et al. Oral-health-related quality of life in patients with cancer: cultural adaptation and  
13 the psychometric testing of the Persian version of EORTC QLQ-OH17. *Support Care*  
14 *Cancer* 2015;23(5):1215-24.  
15  
16  
17  
18  
19  
20  
21 43. Jiang XH, Shen ZZ, Zhang NN, Liao HX, Xu HY. Research on  
22 reliability and validity of questionnaire. *Mod Prev Med* 2010;37(3):429-431. [In  
23 Chinese]  
24  
25  
26  
27  
28  
29 44. Pereira M, Martins A, Alves S, Canavarro MC. Assessing quality of life in  
30 middle-aged and older adults with HIV: psychometric testing of the  
31 WHOQOL-HIV-Bref. *Qual Life Res* 2014;23(9):2473-9.  
32  
33  
34  
35  
36 45. Canavarro MC, Pereira M. Factor structure and psychometric properties of the  
37 European Portuguese version of a questionnaire to assess quality of life in  
38 HIV-infected adults: the WHOQOL-HIV-Bref. *AIDS Care* 2012;24(6):799-807.  
39  
40  
41  
42  
43 46. Tesfaye M, Olsen MF, Medhin G, Friis H, Hanlon C, Holm L. Adaptation and  
44 validation of the short version WHOQOL-HIV in Ethiopia. *Int J Ment Health Syst*  
45 2016;10:29.  
46  
47  
48  
49  
50  
51 47. Chandra PS, Gandhi C, Satishchandra P, Kamat A, Desai A, Ravi V, et al. Quality  
52 of life in HIV subtype C infection among asymptomatic subjects and its association  
53 with CD4 counts and viral loads-a study from South India. *Qual Life Res*  
54  
55  
56  
57  
58  
59  
60

1  
2  
3  
4 2006;15(10):1597-1605.

5  
6 48. Peltzer K, Phaswanamafuya N. Health-related quality of life in a sample of  
7  
8 HIV-infected South Africans. *Afr J AIDS Res* 2008;7(2):209-218.

9  
10  
11 49. Tran BX. Quality of life outcomes of antiretroviral treatment for HIV/AIDS  
12 patients in Vietnam. *Plos One* 2012;7(7):e41062.

13  
14  
15  
16  
17  
18  
19 **Fig 1. The structure of the Chinese version of the WHOQOL-HIV BREF based on**  
20 **confirmatory factor analysis.**  
21  
22  
23  
24  
25  
26  
27  
28  
29  
30  
31  
32  
33  
34  
35  
36  
37  
38  
39  
40  
41  
42  
43  
44  
45  
46  
47  
48  
49  
50  
51  
52  
53  
54  
55  
56  
57  
58  
59  
60

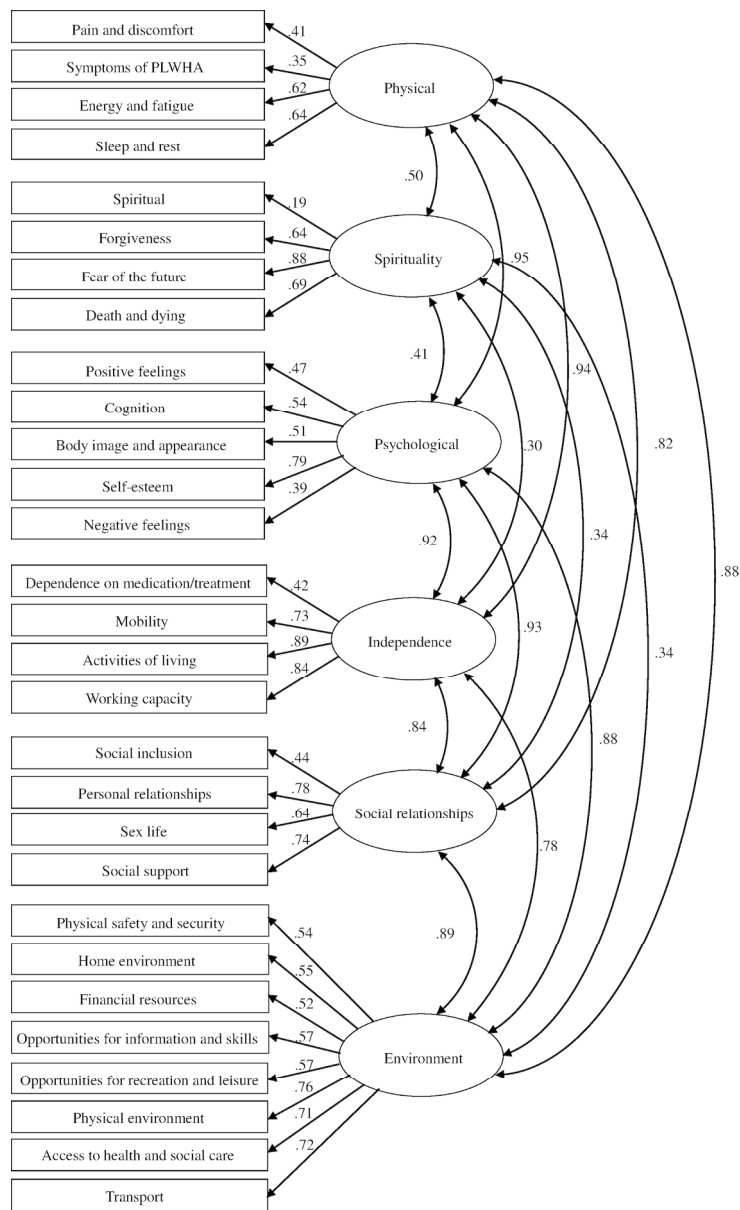

Fig 1. The structure of the Chinese version of the WHOQOL-HIV BREF based on confirmatory factor analysis.

134x222mm (300 x 300 DPI)

STROBE 2007 (v4) Statement—Checklist of items that should be included in reports of *cross-sectional studies*

| Section/Topic             | Item # | Recommendation                                                                                                                                                                       | Reported on page # |
|---------------------------|--------|--------------------------------------------------------------------------------------------------------------------------------------------------------------------------------------|--------------------|
| Title and abstract        | 1      | (a) Indicate the study’s design with a commonly used term in the title or the abstract                                                                                               | 2                  |
|                           |        | (b) Provide in the abstract an informative and balanced summary of what was done and what was found                                                                                  | 2, 3               |
| <b>Introduction</b>       |        |                                                                                                                                                                                      |                    |
| Background/rationale      | 2      | Explain the scientific background and rationale for the investigation being reported                                                                                                 | 4, 5               |
| Objectives                | 3      | State specific objectives, including any prespecified hypotheses                                                                                                                     | 5                  |
| <b>Methods</b>            |        |                                                                                                                                                                                      |                    |
| Study design              | 4      | Present key elements of study design early in the paper                                                                                                                              | 6, 7               |
| Setting                   | 5      | Describe the setting, locations, and relevant dates, including periods of recruitment, exposure, follow-up, and data collection                                                      | 6, 7               |
| Participants              | 6      | (a) Give the eligibility criteria, and the sources and methods of selection of participants                                                                                          | 6                  |
| Variables                 | 7      | Clearly define all outcomes, exposures, predictors, potential confounders, and effect modifiers. Give diagnostic criteria, if applicable                                             | 7, 8               |
| Data sources/ measurement | 8*     | For each variable of interest, give sources of data and details of methods of assessment (measurement). Describe comparability of assessment methods if there is more than one group | 7, 8               |
| Bias                      | 9      | Describe any efforts to address potential sources of bias                                                                                                                            | 6                  |

1  
2  
3  
4  
5  
6  
7  
8  
9  
10  
11  
12  
13  
14  
15  
16  
17  
18  
19  
20  
21  
22  
23  
24  
25  
26  
27  
28  
29  
30  
31  
32  
33  
34  
35  
36  
37  
38  
39  
40  
41  
42  
43  
44  
45  
46  
47  
48  
49

|                        |     |                                                                                                                                                                                                              |       |
|------------------------|-----|--------------------------------------------------------------------------------------------------------------------------------------------------------------------------------------------------------------|-------|
| Study size             | 10  | Explain how the study size was arrived at                                                                                                                                                                    | 6, 7  |
| Quantitative variables | 11  | Explain how quantitative variables were handled in the analyses. If applicable, describe which groupings were chosen and why                                                                                 |       |
| Statistical methods    | 12  | (a) Describe all statistical methods, including those used to control for confounding                                                                                                                        | 8, 9  |
|                        |     | (b) Describe any methods used to examine subgroups and interactions                                                                                                                                          | 8, 9  |
|                        |     | (c) Explain how missing data were addressed                                                                                                                                                                  | 8     |
|                        |     | (d) If applicable, describe analytical methods taking account of sampling strategy                                                                                                                           | 6, 7  |
|                        |     | (e) Describe any sensitivity analyses                                                                                                                                                                        | N/A   |
| <b>Results</b>         |     |                                                                                                                                                                                                              |       |
| Participants           | 13* | (a) Report numbers of individuals at each stage of study—eg numbers potentially eligible, examined for eligibility, confirmed eligible, included in the study, completing follow-up, and analysed            | 6, 9  |
|                        |     | (b) Give reasons for non-participation at each stage                                                                                                                                                         | 6     |
|                        |     | (c) Consider use of a flow diagram                                                                                                                                                                           | N/A   |
| Descriptive data       | 14* | (a) Give characteristics of study participants (eg demographic, clinical, social) and information on exposures and potential confounders                                                                     | 9, 10 |
|                        |     | (b) Indicate number of participants with missing data for each variable of interest                                                                                                                          | 6     |
| Outcome data           | 15* | Report numbers of outcome events or summary measures                                                                                                                                                         | 9-19  |
| Main results           | 16  | (a) Give unadjusted estimates and, if applicable, confounder-adjusted estimates and their precision (eg, 95% confidence interval). Make clear which confounders were adjusted for and why they were included | 14-19 |
|                        |     | (b) Report category boundaries when continuous variables were categorized                                                                                                                                    | 9-19  |

1  
2  
3  
4  
5  
6  
7  
8  
9  
10  
11  
12  
13  
14  
15  
16  
17  
18  
19  
20  
21  
22  
23  
24  
25  
26  
27  
28  
29  
30  
31  
32  
33  
34  
35  
36  
37  
38  
39  
40  
41  
42  
43  
44  
45  
46  
47  
48  
49

|                          |    |                                                                                                                                                                            |                |
|--------------------------|----|----------------------------------------------------------------------------------------------------------------------------------------------------------------------------|----------------|
|                          |    | (c) If relevant, consider translating estimates of relative risk into absolute risk for a meaningful time period                                                           | N/A            |
| Other analyses           | 17 | Report other analyses done—eg analyses of subgroups and interactions, and sensitivity analyses                                                                             | N/A            |
| <b>Discussion</b>        |    |                                                                                                                                                                            |                |
| Key results              | 18 | Summarise key results with reference to study objectives                                                                                                                   | 19, 20, 21, 22 |
| Limitations              | 19 | Discuss limitations of the study, taking into account sources of potential bias or imprecision. Discuss both direction and magnitude of any potential bias                 | 22             |
| Interpretation           | 20 | Give a cautious overall interpretation of results considering objectives, limitations, multiplicity of analyses, results from similar studies, and other relevant evidence | 19, 20, 21, 22 |
| Generalisability         | 21 | Discuss the generalisability (external validity) of the study results                                                                                                      | 22             |
| <b>Other information</b> |    |                                                                                                                                                                            |                |
| Funding                  | 22 | Give the source of funding and the role of the funders for the present study and, if applicable, for the original study on which the present article is based              | 22             |

\*Give information separately for cases and controls in case-control studies and, if applicable, for exposed and unexposed groups in cohort and cross-sectional studies.

**Note:** An Explanation and Elaboration article discusses each checklist item and gives methodological background and published examples of transparent reporting. The STROBE checklist is best used in conjunction with this article (freely available on the Web sites of PLoS Medicine at <http://www.plosmedicine.org/>, Annals of Internal Medicine at <http://www.annals.org/>, and Epidemiology at <http://www.epidem.com/>). Information on the STROBE Initiative is available at [www.strobe-statement.org](http://www.strobe-statement.org).
